# Supplementary material for: An integrative approach to discern the seed dispersal role of frugivorous guilds in a Mediterranean semiarid priority habitat
Source: PeerJ. 2019 Oct 11;7:e7609. doi: 10.7717/peerj.7609 (PMC6792472; doi:10.7717/peerj.7609)
Supplement: Supplemental Information 2 [file peerj-07-7609-s002.xlsx]

## Sheet: Data accesibility
GenBank accession numbers	ID	Date	Zone	Total nº of seeds	Nº	Plant sp 1	Nº	Plant sp 2	Size (pb)	Identified seed disperser	Percentage	Sequenced region	Sequence
MN199839	1	2016-10-24	Gorguel	1	1	Osyris lanceolata	0	NA	229	Turdus viscivorus	100	COI-fsdF /COI-fsd-degR	GCATGAGCCGGAATAGTAGGCACTGCCCTAAGTCTCCTCATCCGAGCAGAACTAGGCCAACCAGGCGCCCTACTGGGTGACGACCAAATCTATAACGTAGTCGTTACTGCCCATGCTTTCGTAATAATCTTCTTCATAGTTATGCCAATTATAATTGGAGGGTTTGGAAACTGACTAGTCCCTCTAATAATCGGAGCCCCAGACATAGCATTCCCCCGAATAAACAACA
MN199940	2	2016-10-24	Gorguel	1	1	Pistacia lentiscus	0	NA	226	Erithacus rubecula	99.55	COI-fsd-degF	TAAGCTTCTGACTACTCCCCCCATCCTTCCTTCTTCTCCTAGCCTCCTCTACAGTTGAAGCCGGAGCCGGGACAGGCTGAACCGTATATCCACCTCTAGCCGGCAACCTGGCCCACGCCGGAGCCTCAGTAGACCTGGCCATCTTCTCCCTCCACCTAGCAGGTATTTCCTCAATCCTAGGTGCCATCAATTTCATCACAACCGCCATTAACATAAAACCACCTGC
MN199941	3	2016-10-24	Gorguel	1	1	Phoenix dactylifera	0	NA	203	Turdus viscivorus	99.48	COI-fsd-degF/COI-fsdR	TTCTCCTAGCCTCTTCCACAGTAGAAGCAGGGGCGGGAACAGGCTGAACCGTCTATCCACCCCTCGCTGGCAACTTAGCCCATGCAGGAGCTTCAGTAGACCTGGCCATCTTCTCCCTCCACCTGGCAGGTATTTCCTCAATTCTGGGGGCCATCAACTTCATTACAACAGCAATTAACATAAAACCACCTGCCCTATCACAA
MN199840	4	2016-10-24	Gorguel	1	1	Pistacia lentiscus	0	NA	227	Phoenicurus ochruros	99.62	COI-fsd-degF/COI-fsdR	GGAGCCCCAGACATAGCATTCCCCCGAATAAATAACATAAGCTTCTGACTTCTTCCCCCATCCTTTCTACTCCTCCTAGCCTCTTCCACCGTTGAAGCAGGGGCAGGAACAGGCTGAACTGTATATCCTCCTCTCGCCGGTAACTTAGCCCATGCCGGAGCTTCAGTAGACCTAGCCATCTTCTCCCTTCACCTAGCAGGTATCTCCTCCATCCTGGGCGCTATCAACTTCATCACCACAGCAATTAACATAAAACCACCTGCCCT
MN199882	5	2016-10-24	Cola de Caballo	1	1	Pistacia lentiscus	0	NA	226	Turdus merula	100	COI-fsd-degF	ACTCCTCCCCCCATCCTTCCTCCTCCTCCTAGCCTCCTCTACAGTAGAAGCTGGAGCAGGAACAGGTTGAACCGTCTATCCCCCCCTCGCCGGCAATCTAGCACATGCAGGGGCTTCAGTAGACTTAGCTATCTTCTCCCTACACCTCGCAGGAATCTCCTCAATCCTGGGGGCTATTAACTTCATCACAACAGCGATCAACATAAAACCACCTGCCCTATCACAA
MN199841	6	2016-10-24	Gorguel	1	1	Asparagus albus	0	NA	465	Turdus viscivorus	99.78	COI-fsdF /COI-fsd-degR - COI-fsd-degF/COI-fsdR	GCATGAGCCGGAATAGTAGGCACTGCCCTAAGTCTCCTCATCCGAGCAGAACTAGGCCAACCAGGCGCCCTACTGGGTGACGACCAAATCTATAACGTAGTCGTTACTGCCCATGCTTTCGTAATAATCTTCTTCATAGTTATGCCAATTATAATTGGAGGGTTTGGAAACTGACTAGTCCCTCTAATAATCGGAGCCCCAGACATAGCATTCCCCCGAATAAACAACATAAGCTTCTGGCTACTTCCCCCATCCTTCCTCCTTCTCCTAGCCTCTTCCACAGTAGAAGCAGGGGCGGGAACAGGCTGAACCGTCTATCCACCCCTCGCTGGCAACTTAGCCCATGCAGGAGCTTCAGTAGACCTGGCCATCTTCTCCCTCCACCTGGCAGGTATTTCC…
MN199842	7	2016-10-24	Escombreras	1	1	Asparagus horridus	0	NA	228	Turdus viscivorus	99.42	COI-fsd-degF	GCAGGGGCGGGAACAGGCTGAACCGTCTATCCACCCCTCGCTGGCAACTTAGCCCATGCAGGAGCTTCAGTAGACCTGGCCATCTTCTCCCTCCACCTGGCAGGTATTTCCTCAATTCTGGGGGCCATCAACTTCATTACAACAGCAATTAACATAAAACCACCTGCCCTATCACAAGCATGAGCCGGAATAGTGGGGTTGAATTTGAAACCACCTGCCCTATCACAA
MN199942	8	2016-11-14	Cola de Caballo	1	1	Osyris lanceolata	0	NA	227	Turdus viscivorus	99.54	COI-fsd-degF	GGCTACTTCCCCCATCCTTCCTCCTTCTCCTAGCCTCTTCCACAGTAGAAGCAGGGGCGGGAACAGGCTGAACCGTCTATCCACCCCTCGCTGGCAACTTAGCCCATGCAGGAGCTTCAGTAGACCTGGCCATCTTCTCCCTCCACCTGGCAGGTATTTCCTCAATTCTGGGGGCCATCAACTTCATTACAACAGCAATTAACATAAAACCACCTGCCCTATCACAA
	9	2016-11-14	Cola de Caballo	2	1	Myrtus comunis	1	Lycium intricatum	Does not amplify	Does not amplify	Does not amplify	Does not amplify	Does not amplify
	10	2016-11-14	Escombreras	1	1	Asparagus horridus	0	NA	Does not amplify	Does not amplify	Does not amplify	Does not amplify	Does not amplify
MN199843	11	2016-11-14	Escombreras	1	1	Asparagus horridus	0	NA	222	Turdus viscivorus	99.54	COI-fsd-degF	CTTCCCCCATCCTTCCTCCTTCTCCTAGCCTCTTCCACAGTAGAAGCAGGGGCGGGAACAGGCTGAACCGTCTATCCACCCCTCGCTGGCAACTTAGCCCATGCAGGAGCTTCAGTAGACCTGGCCATCTTCTCCCTCCACCTGGCAGGTATTTCCTCAATTCTGGGGGCCATCAACTTCATTACAACAGCAATTAACATAAAACCACCTGCCCTATCACAA
MN199943	12	2016-11-14	Escombreras	2	2	Asparagus horridus	0	NA	253	Turdus viscivorus	99.48	COI-fsd-degF	TCCTAGCCTCTTCCACAGTAGAAGCAGGGGCGGGAACAGGCTGAACCGTCTATCCACCCCTCGCTGGCAACTTAGCCCATGCAGGAGCTTCAGTAGACCTGGCCATCTTCTCCCTCCACCTGGCAGGTATTTCCTCAATTCTGGGGGCCATCAACTTCATTACAACAGCAATTAACATAAAACCACCTGCCCTATCACAAGCATGAGCCGGAATAGTGGGGTTGAATTTGAAACCACCTGCCCTATCACAATC
MN199883	13	2016-11-14	Gorguel	1	1	Pistacia lentiscus	0	NA	264	Erithacus rubecula	99.62	COI-fsd-degF/COI-fsdR	TGGAGCCCCAGACATAGCATTCCCCCGAATAAACAACATAAGCTTCTGACTACTCCCCCCATCCTTCCTTCTTCTCCTAGCCTCCTCTACAGTTGAAGCCGGAGCCGGGACAGGCTGAACCGTATATCCACCTCTAGCCGGCAACCTGGCCCACGCCGGAGCCTCAGTAGACCTGGCCATCTTCTCCCTCCACCTAGCAGGTATTTCCTCAATCCTAGGTGCCATCAATTTCATCACAACCGCCATTAACATAAAACCACCTGC
MN199844	14	2016-11-14	Gorguel	1	1	Pistacia lentiscus	0	NA	225	Sylvia undata	99.54	COI-fsd-degF	CTACTCCCCCCATCATTTCTCCTCCTTCTAGCCTCTTCCACAGTAGAAGCTGGTGTAGGCACAGGATGAACTGTCTACCCCCCACTAGCTGGCAACCTGGCCCACGCTGGAGCTTCAGTAGACCTAGCCATCTTCTCCCTCCACCTCGCAGGAATCTCATCCATCCTGGGAGCAATCAACTTCATCACAACAGCAATCAATATAAAACCACCTGCCCTNTCACAA
MN199845	15	2016-11-14	Cola de Caballo	1	1	Osyris lanceolata	0	NA	465	Turdus viscivorus	99.78	COI-fsdF /COI-fsd-degR - COI-fsd-degF/COI-fsdR	GCATGAGCCGGAATAGTAGGCACTGCCCTAAGTCTCCTCATCCGAGCAGAACTAGGCCAACCAGGCGCCCTACTGGGTGACGACCAAATCTATAACGTAGTCGTTACTGCCCATGCTTTCGTAATAATCTTCTTCATAGTTATGCCAATTATAATTGGAGGGTTTGGAAACTGACTAGTCCCTCTAATAATCGGAGCCCCAGACATAGCATTCCCCCGAATAAACAACATAAGCTTCTGGCTACTTCCCCCATCCTTCCTCCTTCTCCTAGCCTCTTCCACAGTAGAAGCAGGGGCGGGAACAGGCTGAACCGTCTATCCACCCCTCGCTGGCAACTTAGCCCATGCAGGAGCTTCAGTAGACCTGGCCATCTTCTCCCTCCACCTGGCAGGTATTTCC…
MN199884	16	2016-11-14	Cola de Caballo	1	1	Pistacia lentiscus	0	NA	225	Erithacus rubecula	99.55	COI-fsd-degF	AAGCTTCTGACTACTCCCCCCATCCTTCCTTCTTCTCCTAGCCTCCTCTACAGTTGAAGCCGGAGCCGGGACAGGCTGAACCGTATATCCACCTCTAGCCGGCAACCTGGCCCACGCCGGAGCCTCAGTAGACCTGGCCATCTTCTCCCTCCACCTAGCAGGTATTTCCTCAATCCTAGGTGCCATCAATTTCATCACAACCGCCATTAACATAAAACCACCTGC
MN199846	17	2016-11-14	Cola de Caballo	1	1	Daphne gnidium	0	NA	219	Turdus viscivorus	99.53	COI-fsd-degF	CCCCCATCCTTCCTCCTTCTCCTAGCCTCTTCCACAGTAGAAGCAGGGGCGGGAACAGGCTGAACCGTCTATCCACCCCTCGCTGGCAACTTAGCCCATGCAGGAGCTTCAGTAGACCTGGCCATCTTCTCCCTCCACCTGGCAGGTATTTCCTCAATTCTGGGGGCCATCAACTTCATTACAACAGCAATTAACATAAAACCACCTGCCCTATCACAA
MN199885	18	2016-11-14	Gorguel	1	1	Pistacia lentiscus	0	NA	199	Turdus viscivorus	99.48	COI-fsd-degF	CCTAGCCTCTTCCACAGTAGAAGCAGGGGCGGGAACAGGCTGAACCGTCTATCCACCCCTCGCTGGCAACTTAGCCCATGCAGGAGCTTCAGTAGACCTGGCCATCTTCTCCCTCCACCTGGCAGGTATTTCCTCAATTCTGGGGGCCATCAACTTCATTACAACAGCAATTAACATAAAACCACCTGCCCTATCACAA
MN199847	19	2016-11-14	Gorguel	1	1	Pistacia lentiscus	0	NA	452	Sylvia melanocepaha	99.78	COI-fsdF /COI-fsd-degR - COI-fsd-degF/COI-fsdR	GCATGAGCCGGAATAGTGGGTACCGCCCTAAGCCTCCTTATCCGAGCAGAACTAGGTCAACCTGGCGCCCTCCTGGGAGACGACCAAATCTACAACGTAATCGTCACTGCCCACGCCTTCGTAATAATCTTCTTTATAGTAATACCAATCATAATCGGAGGATTTGGAAACTGACTAGTCCCCCTAATAATTGGAGCCCCAGATATAGCATTTCCCCGAATAAACAACATAAGCTTCTGACTACTTCCCCCATCATTCCTCCTCCTACTAGCCTCCTCCACAGTAGAAGCCGGTGTGGGCACAGGATGAACTGTCTATCCCCCACTAGCCGGCAACCTGGCCCATGCCGGAGCCTCAGTAGACCTGGCCATTTTCTCCCTCCACCTTGCAGGAATCTCA…
MN199886	20	2016-11-14	Gorguel	2	2	Pistacia lentiscus	0	NA	235	Erithacus rubecula	99.55	COI-fsd-degF	AAGCTTCTGACTACTCCCCCCATCCTTCCTTCTTCTCCTAGCCTCCTCTACAGTTGAAGCCGGAGCCGGGACAGGCTGAACCGTATATCCACCTCTAGCCGGCAACCTGGCCCACGCCGGAGCCTCAGTAGACCTGGCCATCTTCTCCCTCCACCTAGCAGGTATTTCCTCAATCCTAGGTGCCATCAATTTCATCACAACCGCCATTAACATAAAACCACCGCCCCTCTCACAA
MN199944	21	2016-11-14	Cola de Caballo	1	1	Pistacia lentiscus	0	NA	194	Turdus viscivorus	99.46	COI-fsd-degF	CCTCTTCCACAGTAGAAGCAGGGGCGGGAACAGGCTGAACCGTCTATCCACCCCTCGCTGGCAACTTAGCCCATGCAGGAGCTTCAGTAGACCTGGCCATCTTCTCCCTCCACCTGGCAGGTATTTCCTCAATTCTGGGGGCCATCAACTTCATTACAACAGCAATTAACATAAAACCACCTGCCCTATCACAA
MN199945	22	2016-11-14	Cola de Caballo	2	2	Myrtus comunis	0	NA	203	Turdus viscivorus	99.48	COI-fsd-degF	TTCTCCTAGCCTCTTCCACAGTAGAAGCAGGGGCGGGAACAGGCTGAACCGTCTATCCACCCCTCGCTGGCAACTTAGCCCATGCAGGAGCTTCAGTAGACCTGGCCATCTTCTCCCTCCACCTGGCAGGTATTTCCTCAATTCTGGGGGCCATCAACTTCATTACAACAGCAATTAACATAAAACCACCTGCCCTATCACAA
MN199848	23	2016-11-14	Gorguel	3	3	Pistacia lentiscus	0	NA	219	Turdus viscivorus	99.53	COI-fsd-degF	CCCCCATCCTTCCTCCTCCTCCTAGCCTCTTCCACAGTAGAAGCAGGGGCGGGAACAGGCTGAACCGTCTATCCACCCCTCGCTGGCAACTTAGCCCATGCAGGAGCTTCAGTAGACCTGGCCATCTTCTCCCTCCACCTGGCAGGTATTTCCTCAATTCTGGGGGCCATCAACTTCATTACAACAGCAATTAACATAAAACCACCTGCCCTATCACAA
MN199946	24	2016-11-14	Gorguel	1	1	Pistacia lentiscus	0	NA	203	Turdus viscivorus	99.48	COI-fsd-degF	TTCTCCTAGCCTCTTCCACAGTAGAAGCAGGGGCGGGAACAGGCTGAACCGTCTATCCACCCCTCGCTGGCAACTTAGCCCATGCAGGAGCTTCAGTAGACCTGGCCATCTTCTCCCTCCACCTGGCAGGTATTTCCTCAATTCTGGGGGCCATCAACTTCATTACAACAGCAATTAACATAAAACCACCTGCCCTATCACAA
MN199947	25	2016-11-14	Gorguel	1	1	Pistacia lentiscus	0	NA	203	Turdus viscivorus	99.48	COI-fsd-degF	TTCTCCTAGCCTCTTCCACAGTAGAAGCAGGGGCGGGAACAGGCTGAACCGTCTATCCACCCCTCGCTGGCAACTTAGCCCATGCAGGAGCTTCAGTAGACCTGGCCATCTTCTCCCTCCACCTGGCAGGTATTTCCTCAATTCTGGGGGCCATCAACTTCATTACAACAGCAATTAACATAAAACCACCTGCCCTATCACAA
MN199887	26	2016-11-14	Gorguel	2	2	Pistacia lentiscus	0	NA	230	Erithacus rubecula	100	COI-fsdF /COI-fsd-degR	TGCATGAGCCGGAATAGTNGGCACCGCCCTAAGCCTCCTAATCCGAGCAGAACTGGGTCAACCAGGCGCCCTACTAGGAGACGACCAAGTATATAATGTTGTAGTAACAGCCCATGCTTTCGTAATAATCTTCTTCATAGTTATACCAATCATGATCGGCGGATTCGGAAATTGACTGGTCCCCCTAATAATTGGAGCCCCAGACATAGCATTCCCCCGAATAAACAACA
MN199888	27	2016-11-14	Gorguel	1	1	Pistacia lentiscus	0	NA	441	Erithacus rubecula	99.77	COI-fsdF /COI-fsd-degR - COI-fsd-degF/COI-fsdR	GGTAGGCACCGCCCTAAGCCTCCTAATCCGAGCAGAACTGGGTCAACCAGGCGCCCTACTAGGAGACGACCAAGTATATAATGTTGTAGTAACAGCCCATGCTTTCGTAATAATCTTCTTCATAGTTATACCAATCATGATCGGCGGATTCGGAAATTGACTGGTCCCCCTAATAATTGGAGCCCCAGACATAGCATTCCCCCGAATAAACAACATAAGCTTCTGACTACTCCCCCCATCCTTCCTTCTTCTCCTAGCCTCCTCTACAGTTGAAGCCGGAGCCGGGACAGGCTGAACCGTATATCCACCTCTAGCCGGCAACCTGGCCCACGCCGGAGCCTCAGTAGACCTGGCCATCTTCTCCCTCCACCTAGCAGGTATTTCCTCAATCCTAGGTGC…
	28	2016-11-14	Gorguel	1	1	Pistacia lentiscus	0	NA	Does not amplify	Does not amplify	Does not amplify	Does not amplify	Does not amplify
	29	2016-11-14	Gorguel	2	2	Osyris lanceolata	0	NA	Does not amplify	Does not amplify	Does not amplify	Does not amplify	Does not amplify
	30	2016-11-14	Gorguel	1	1	Pistacia lentiscus	0	NA	Does not amplify	Does not amplify	Does not amplify	Does not amplify	Does not amplify
MN199948	31	2016-11-14	Cola de Caballo	1	1	Osyris lanceolata	0	NA	182	Turdus viscivorus	100	COI-fsd-degF	AAGAAGCAGGGGCGGGAACAGGCTGAACCGTCTATCCACCCCTCGCTGGCAACTTAGCCCATGCAGGAGCTTCAGTAGACCTGGCCATCTTCTCCCTCCACCTGGCAGGTATTTCCTCAATTCTGGGGGCCATCAACTTCATTACAACAGCAATTAACATAAAACCACCCGCCCTATCACAA
MN199949	32	2016-11-14	Cola de Caballo	1	1	Pistacia lentiscus	0	NA	159	Turdus viscivorus	100	COI-fsdF	TACTGGGTGACGACCAAATCTATAACGTAGTCGTTACTGCCCATGCTTTCGTAATAATCTTCTTCATAGTTATGCCAATTATAATTGGAGGGTTTGGAAACTGACTAGTCCCTCTAATAATCGGAGCCCCAGACATAGCATTCCCCCGAATAAACAACA
MN199849	33	2016-11-14	Cola de Caballo	3	2	Osyris lanceolata	1	Daphne gnidium	225	Turdus viscivorus	99.54	COI-fsd-degF	CTACTTCCCCCATCCTTCCTCCTTCTCCTAGCCTCTTCCACAGTAGAAGCAGGGGCGGGAACAGGCTGAACCGTCTATCCACCCCTCGCTGGCAACTTAGCCCATGCAGGAGCTTCAGTAGACCTGGCCATCTTCTCCCTCCACCTGGCAGGTATTTCCTCAATTCTGGGGGCCATCAACTTCATTACAACAGCAATTAACATAAAACCACCTGCCCTATCACAA
MN199889	34	2016-11-14	Cola de Caballo	1	1	Osyris lanceolata	0	NA	226	Turdus viscivorus	99.54	COI-fsd-degF	GCTACTTCCCCCATCCTTCCTCCTTCTCCTAGCCTCTTCCACAGTAGAAGCAGGGGCGGGAACAGGCTGAACCGTCTATCCACCCCTCGCTGGCAACTTAGCCCATGCAGGAGCTTCAGTAGACCTGGCCATCTTCTCCCTCCACCTGGCAGGTATTTCCTCAATTCTGGGGGCCATCAACTTCATTACAACAGCAATTAACATAAAACCACCTGCCCTATCACAA
MN199890	35	2016-11-14	Cola de Caballo	3	3	Pistacia lentiscus	0	NA	226	Turdus viscivorus	99.54	COI-fsd-degF	GCTACTTCCCCCATCCTTCCTCCTTCTCCTAGCCTCTTCCACAGTAGAAGCAGGGGCGGGAACAGGCTGAACCGTCTATCCACCCCTCGCTGGCAACTTAGCCCATGCAGGAGCTTCAGTAGACCTGGCCATCTTCTCCCTCCACCTGGCAGGTATTTCCTCAATTCTGGGGGCCATCAACTTCATTACAACAGCAATTAACATAAAACCACCTGCCCTATCACAA
MN199891	36	2016-11-14	Cola de Caballo	2	1	Osyris lanceolata	1	Daphne gnidium	232	Turdus viscivorus	99.55	COI-fsd-degF	GCTTCTGCTACTTCCCCCATCCTTCCTCCTTCTCCTAGCCTCTTCCACAGTAGAAGCAGGGGCGGGAACAGGCTGAACCGTCTATCCACCCCTCGCTGGCAACTTAGCCCATGCAGGAGCTTCAGTAGACCTGGCCATCTTCTCCCTCCACCTGGCAGGTATTTCCTCAATTCTGGGGGCCATCAACTTCATTACAACAGCAATTAACATAAAACCACCTGCCCTATCACAA
MN199892	37	2016-11-14	Cola de Caballo	6	6	Osyris lanceolata	0	NA	181	Turdus viscivorus	99.43	COI-fsd-degF	AGAAGCAGGGGCGGGAACAGGCTGAACCGTCTATCCACCCCTCGCTGGCAACTTAGCCCATGCAGGAGCTTCAGTAGACCTGGCCATCTTCTCCCTCCACCTGGCAGGTATTTCCTCAATTCTGGGGGCCATCAACTTCATTACAACAGCAATTAACATAAAACCACCTGCCCTATCACAA
MN199850	38	2016-11-14	Cola de Caballo	1	1	Pistacia lentiscus	0	NA	273	Turdus viscivorus	99.63	COI-fsd-degF	GGAGCCCCAGACATAGCATTCCCCCGAATAAACAACATAAGCTTCTGGCTACTTCCCCCATCCTTCCTCCTTCTCCTAGCCTCTTCCACAGTAGAAGCAGGGGCGGGAACAGGCTGAACCGTCTATCCACCCCTCGCTGGCAACTTAGCCCATGCAGGAGCTTCAGTAGACCTGGCCATCTTCTCCCTCCACCTGGCAGGTATTTCCTCAATTCTGGGGGCCATCAACTTCATTACAACAGCAATTAACATAAAACCACCTGCCCTATCACAA
MN199851	39	2016-11-14	Escombreras	2	1	Asparagus horridus	1	Asparagus albus	231	Turdus viscivorus	99.55	COI-fsd-degF	GCTTCTGCTACTTCCCCCATCCTTCCTCCTTCTCCTAGCCTCTTCCACATAGAAGCAGGGGCGGGAACAGGCTGAACCGTCTATCCACCCCTCGCTGGCAACTTAGCCCATGCAGGAGCTTCAGTAGACCTGGCCATCTTCTCCCTCCACCTGGCAGGTATTTCCTCAATTCTGGGGGCCATCAACTTCATTACAACAGCAATTAACATAAAACCACCTGCCCTATCACAA
MN199950	40	2016-11-14	Escombreras	1	1	Asparagus albus	0	NA	227	Turdus viscivorus	99.54	COI-fsd-degF	GGCTACTTCCCCCATCCTTCCTCCTTCTCCTAGCCTCTTCCACAGTAGAAGCAGGGGCGGGAACAGGCTGAACCGTCTATCCACCCCTCGCTGGCAACTTAGCCCATGCAGGAGCTTCAGTAGACCTGGCCATCTTCTCCCTCCACCTGGCAGGTATTTCCTCAATTCTGGGGGCCATCAACTTCATTACAACAGCAATTAACATAAAACCACCTGCCCTATCACAA
MN199893	41	2016-11-14	Escombreras	1	1	Asparagus albus	0	NA	226	Turdus viscivorus	99.54	COI-fsd-degF	GCTACTTCCCCCATCCTTCCTCCTTCTCCTAGCCTCTTCCACAGTAGAAGCAGGGGCGGGAACAGGCTGAACCGTCTATCCACCCCTCGCTGGCAACTTAGCCCATGCAGGAGCTTCAGTAGACCTGGCCATCTTCTCCCTCCACCTGGCAGGTATTTCCTCAATTCTGGGGGCCATCAACTTCATTACAACAGCAATTAACATAAAACCACCTGCCCTATCACAA
MN199894	42	2016-11-14	Escombreras	1	1	Osyris lanceolata	0	NA	226	Turdus viscivorus	99.54	COI-fsd-degF	GCTACTTCCCCCATCCTTCCTCCTTCTCCTAGCCTCTTCCACAGTAGAAGCAGGGGCGGGAACAGGCTGAACCGTCTATCCACCCCTCGCTGGCAACTTAGCCCATGCAGGAGCTTCAGTAGACCTGGCCATCTTCTCCCTCCACCTGGCAGGTATTTCCTCAATTCTGGGGGCCATCAACTTCATTACAACAGCAATTAACATAAAACCACCTGCCCTATCACAA
MN199895	43	2016-11-14	Escombreras	1	1	Asparagus horridus	0	NA	226	Turdus viscivorus	99.54	COI-fsd-degF	GCTACTTCCCCCATCCTTCCTCCTTCTCCTAGCCTCTTCCACAGTAGAAGCAGGGGNGGGAACAGGCTGAACCGTCTATCCACCCCTCGCTGGCAACTTAGCCCATGCAGGAGCTTCAGTAGACCTGGCCATCTTCTCCCTCCACCTGGCAGGTATTTCCTCAATTCTGGGGGCCATCAACTTCATTACAACAGCAATTAACATAAAACCACCTGCCCTATCACAA
MN199896	44	2016-11-14	Escombreras	1	1	Asparagus albus	0	NA	226	Turdus viscivorus	99.54	COI-fsd-degF	GCTACTTCCCCCATCCTTCCTCCTTCTCCTAGCCTCTTCCACAGTAGAAGCAGGGGCGGGAACAGGCTGAACCGTCTATCCACCCCTCGCTGGCAACTTAGCCCATGCAGGAGCTTCAGTAGACCTGGCCATCTTCTCCCTCCACCTGGCAGGTATTTCCTCAATTCTGGGGGCCATCAACTTCATTACAACAGCAATTAACATAAAACCACCTGCCCTATCACAA
MN199897	45	2016-11-14	Escombreras	1	1	Asparagus albus	0	NA	274	Turdus viscivorus	99.63	COI-fsd-degF	TGGAGCCCCAGACATAGCATTCCCCCGAATAAACAACATAAGCTTCTGGCTACTTCCCCCATCCTTCCTCCTTCTCCTAGCCTCTTCCACAGTAGAAGCAGGGGCGGGAACAGGCTGAACCGTCTATCCACCCCTCGCTGGCAACTTAGCCCATGCAGGAGCTTCAGTAGACCTGGCCATCTTCTCCCTCCACCTGGCAGGTATTTCCTCAATTCTGGGGGCCATCAACTTCATTACAACAGCAATTAACATAAAACCACCTGCCCTATCACAA
MN199898	46	2016-11-14	Escombreras	1	1	Asparagus albus	0	NA	232	Turdus viscivorus	99.55	COI-fsd-degF	GCTTCTGCTACTTCCCCCATCCTTCCTCCTTCTCCTAGCCTCTTCCACAGTAGAAGCAGGGGCGGGAACAGGCTGAACCGTCTATCCACCCCTCGCTGGCAACTTAGCCCATGCAGGAGCTTCAGTAGACCTGGCCATCTTCTCCCTCCACCTGGCAGGTATTTCCTCAATTCTGGGGGCCATCAACTTCATTACAACAGCAATTAACATAAAACCACCTGCCCTATCACAA
MN199899	47	2016-11-14	Escombreras	1	1	Asparagus horridus	0	NA	232	Turdus viscivorus	99.55	COI-fsd-degF	GCTTCTGCTACTTCCCCCATCCTTCCTCCTTCTCCTAGCCTCTTCCACAGTAGAAGCAGGGGCGGGAACAGGCTGAACCGTCTATCCACCCCTCGCTGGCAACTTAGCCCATGCAGGAGCTTCAGTAGACCTGGCCATCTTCTCCCTCCACCTGGCAGGTATTTCCTCAATTCTGGGGGCCATCAACTTCATTACAACAGCAATTAACATAAAACCACCTGCCCTATCACAA
MN199951	48	2016-11-14	Cola de Caballo	2	2	Pistacia lentiscus	0	NA	236	Sylvia melanocepaha	100	COI-fsd-degF	TAAGCTTCTGACTACTTCCCCCATCATTCCTCCTCCTACTAGCCTCCTCCACAGTAGAAGCCGGTGTGGGCACAGGATGAACTGTCTACCCCCCACTAGCCGGCAACCTGGCCCATGCCGGAGCCTCAGTAGACCTGGCCATTTTCTCCCTCCACCTTGCAGGAATCTCATCCATCCTAGGAGCAATCAACTTCATCACAACAGCAATCAACATAAAACCACCTGCCCTATCACAA
MN199952	49	2016-11-14	Cola de Caballo	1	1	Pistacia lentiscus	0	NA	236	Sylvia melanocepaha	100	COI-fsd-degF	TAAGCTTCTGACTACTTCCCCCATCATTCCTCCTCCTACTAGCCTCCTCCACAGTAGAAGCCGGTGTGGGCACAGGATGAACTGTCTACCCCCCACTAGCCGGCAACCTGGCCCATGCCGGAGCCTCAGTAGACCTGGCCATTTTCTCCCTCCACCTTGCAGGAATCTCATCCATCCTAGGAGCAATCAACTTCATCACAACAGCAATCAACATAAAACCACCTGCCCTATCACAA
MN199852	50	2016-11-14	Cola de Caballo	2	1	Daphne gnidium	1	Pistacia lentiscus	231	Turdus philomelos	99.56	COI-fsd-degF	TTCTGGCTCCTCCCCCCATCCTTCCTCCTTCTCCTAGCCTCCTCCACAGTAGAAGCGGGAGCAGGAACGGGCTGAACTGTTTATCCCCCCCTCGCCGGCAACCTAGCACACGCAGGAGCTTCAGTAGACCTGGCCATCTTCTCCCTCCACCTGGCAGGAATCTCCTCAATCCTGGGGGCTATCAACTTCATCACAACAGCAATTAACATAAAACCACCTGCCCTCTCACAA
MN199953	51	2016-11-14	Cola de Caballo	1	1	Pistacia lentiscus	0	NA	236	Sylvia melanocepaha	100	COI-fsd-degF	TAAGCTTCTGACTACTTCCCCCATCATTCCTCCTCCTACTAGCCTCCTCCACAGTAGAAGCCGGTGTGGGCACAGGATGAACTGTCTACCCCCCACTAGCCGGCAACCTGGCCCATGCCGGAGCCTCAGTAGACCTGGCCATTTTCTCCCTCCACCTTGCAGGAATCTCATCCATCCTAGGAGCAATCAACTTCATCACAACAGCAATCAACATAAAACCACCTGCCCTATCACAA
MN199954	52	2016-11-28	Gorguel	1	1	Osyris lanceolata	0	NA	223	Turdus viscivorus	99.53	COI-fsd-degF	TTCCCCCATCCTTCCTCCTTCTCCTAAGCCTCTTCCACAGTAGAAGCAGGGGCGGGAACAGGCTGAACCGTCTATCCACCCCTCGCTGGCAACTTAGCCCATGCAGGAGCTTCAGTAGACCTGGCCATCTTCTCCCTCCACCTGGCAGGTATTTCCTCAATTCTGGGGGCCATCAACTTCATTACAACAGCAATTAACATAAAACCACCTGCCCTATCACAAG
MN199853	53	2016-11-28	Gorguel	1	1	Osyris lanceolata	0	NA	273	Turdus viscivorus	99.63	COI-fsd-degF	GGAGCCCCAGACATAGCATTCCCCCGAATAAACAACATAAGCTTCTGGCTACTTCCCCCATCCTTCCTCCTTCTCCTAGCCTCTTCCACAGTAGAAGCAGGGGCGGGAACAGGCTGAACCGTCTATCCACCCCTCGCTGGCAACTTAGCCCATGCAGGAGCTTCAGTAGACCTGGCCATCTTCTCCCTCCACCTGGCAGGTATTTCCTCAATTCTGGGGGCCATCAACTTCATTACAACAGCAATTAACATAAAACCACCTGCCCTATCACAA
MN199900	54	2016-11-28	Gorguel	1	1	Osyris lanceolata	0	NA	215	Turdus viscivorus	99.52	COI-fsd-degF	ATCCTTCCTCCTTCTCCTAAGCCTCTTCCACAGTAGAAGCAGGGGCGGGAACAGGCTGAACCGTCTATCCACCCCTCGCTGGCAACTTAGCCCATGCAGGAGCTTCAGTAGACCTGGCCATCTTCTCCCTCCACCTGGCAGGTATTTCCTCAATTCTGGGGGCCATCAACTTCATTACAACAGCAATTAACATAAAACCACCTGCCCTATCACAA
MN199901	55	2016-11-28	Escombreras	3	3	Lycium intrincatum	0	NA	223	Turdus viscivorus	99.54	COI-fsd-degF	CTTCCCCCATCCTTCCTCCTGTCTCCTAGCCTCTTCCACAGTAGAAGCAGGGGCGGGAACAGGCTGAACCGTCTATCCACCCCTCGCTGGCAACTTAGCCCATGCAGGAGCTTCAGTAGACCTGGCCATCTTCTCCCTCCACCTGGCAGGTATTTCCTCAATTCTGGGGGCCATCAACTTCATTACAACAGCAATTAACATAAAACCACCTGCCCTATCACAA
MN199902	56	2016-11-28	Escombreras	5	5	Lycium intrincatum	0	NA	181	Turdus viscivorus	99.43	COI-fsd-degF	AGAAGCAGGGGCGGGAACAGGCTGAACCGTCTATCCACCCCTCGCTGGCAACTTAGCCCATGCAGGAGCTTCAGTAGACCTGGCCATCTTCTCCCTCCACCTGGCAGGTATTTCCTCAATTCTGGGGGCCATCAACTTCATTACAACAGCAATTAACATAAAACCACCTGCCCTATCACAA
MN199955	57	2016-11-28	Escombreras	6	6	Lycium intrincatum	0	NA	220	Sylvia melanocepaha	99.52	COI-fsd-degF	CCCCATCATTCCTCCTCCTACTAGCCTCCTCCACAGTAGAAGCCGGTGTGGGCACAGGATGAACTGTCTATCCCCCACTAGCCGGCAACCTGGCCCATGCCGGAGCCTCAGTAGACCTGGCCATTTTCTCCCTCCACCTTGCAGGAATCTCATCCATCCTAGGAGCAATCAACTTCATCACAACAGCAATCAACATAAAACCACCGCCCCTATCACAATA
MN199854	58	2016-11-28	Escombreras	5	5	Lycium intrincatum	0	NA	183	Turdus viscivorus	99.44	COI-fsd-degF	GTAGAAGCAGGGGCGGGAACAGGCTGAACCGTCTATCCACCCCTCGCTGGCAACTTAGCCCATGCAGGAGCTTCAGTAGACCTGGCCATCTTCTCCCTCCACCTGGCAGGTATTTCCTCAATTCTGGGGGCCATCAACTTCATTACAACAGCAATTAACATAAAACCACCTGCCCTATCACAA
MN199855	59	2016-11-28	Escombreras	3	3	Lycium intrincatum	0	NA	195	Turdus viscivorus	99.47	COI-fsd-degF	GCCTCTTCCACAGTAGAAGCAGGGGCGGGAACAGGCTGAACCGTCTATCCACCCCTCGCTGGCAACTTAGCCCATGCAGGAGCTTCAGTAGACCTGGCCATCTTCTCCCTCCACCTGGCAGGTATTTCCTCAATTCTGGGGGCCATCAACTTCATTACAACAGCAATTAACATAAAACCACCTGCCCTATCACAA
MN199856	60	2016-11-28	Escombreras	4	4	Lycium intrincatum	0	NA	195	Turdus viscivorus	99.47	COI-fsd-degF	GCCTCTTCCACAGTAGAAGCAGGGGCGGGAACAGGCTGAACCGTCTATCCACCCCTCGCTGGCAACTTAGCCCATGCAGGAGCTTCAGTAGACCTGGCCATCTTCTCCCTCCACCTGGCAGGTATTTCCTCAATTCTGGGGGCCATCAACTTCATTACAACAGCAATTAACATAAAACCACCTGCCCTATCACAA
MN199857	61	2016-11-28	Escombreras	1	1	Asparagus horridus	0	NA	195	Turdus viscivorus	99.47	COI-fsd-degF	GCCTCTTCCACAGTAGAAGCAGGGGCGGGAACAGGCTGAACCGTCTATCCACCCCTCGCTGGCAACTTAGCCCATGCAGGAGCTTCAGTAGACCTGGCCATCTTCTCCCTCCACCTGGCAGGTATTTCCTCAATTCTGGGGGCCATCAACTTCATTACAACAGCAATTAACATAAAACCACCTGCCCTATCACAA
MN199956	62	2016-11-28	Escombreras	5	5	Lycium intrincatum	0	NA	233	Sylvia melanocepaha	100	COI-fsd-degF	GCTTCTGACTACTTCCCCCATCATTCCTCCTCCTACTAGCCTCCTCCACAGTAGAAGCTGGTGTGGGCACAGGATGAACTGTCTACCCCCCACTAGCCGGCAACCTGGCCCATGCCGGAGCCTCAGTAGACCTGGCCATTTTCTCCCTCCACCTTGCAGGAATCTCATCCATCCTAGGAGCAATCAACTTCATCACAACAGCAATCAACATAAAACCACCTGCCCTATCACAA
MN199903	63	2016-11-28	Escombreras	1	1	Osyris lanceolata	0	NA	181	Turdus viscivorus	99.43	COI-fsd-degF	AGAAGCAGGGGCGGGAACAGGCTGAACCGTCTATCCACCCCTCGCTGGCAACTTAGCCCATGCAGGAGCTTCAGTAGACCTGGCCATCTTCTCCCTCCACCTGGCAGGTATTTCCTCAATTCTGGGGGCCATCAACTTCATTACAACAGCAATTAACATAAAACCACCTGCCCTATCACAA
	64	2016-11-28	Cola de Caballo	1	1	Osyris lanceolata	0	NA	Does not amplify	Does not amplify	Does not amplify	Does not amplify	Does not amplify
MN199904	65	2016-11-28	Cola de Caballo	1	1	Daphne gnidium	0	NA	181	Turdus viscivorus	99.43	COI-fsd-degF	AGAAGCAGGGGCGGGAACAGGCTGAACCGTCTATCCACCCCTCGCTGGCAACTTAGCCCATGCAGGAGCTTCAGTAGACCTGGCCATCTTCTCCCTCCACCTGGCAGGTATTTCCTCAATTCTGGGGGCCATCAACTTCATTACAACAGCAATTAACATAAAACCACCTGCCCTATCACAA
MN199905	66	2016-11-28	Cola de Caballo	1	1	Osyris lanceolata	0	NA	181	Turdus viscivorus	99.43	COI-fsd-degF	AGAAGCAGGGGCGGGAACAGGCTGAACCGTCTATCCACCCCTCGCTGGCAACTTAGCCCATGCAGGAGCTTCAGTAGACCTGGCCATCTTCTCCCTCCACCTGGCAGGTATTTCCTCAATTCTGGGGGCCATCAACTTCATTACAACAGCAATTAACATAAAACCACCTGCCCTATCACAA
MN199906	67	2016-11-28	Cola de Caballo	1	1	Daphne gnidium	0	NA	181	Turdus viscivorus	99.43	COI-fsd-degF	AGAAGCAGGGGCGGGAACAGGCTGAACCGTCTATCCACCCCTCGCTGGCAACTTAGCCCATGCAGGAGCTTCAGTAGACCTGGCCATCTTCTCCCTCCACCTGGCAGGTATTTCCTCAATTCTGGGGGCCATCAACTTCATTACAACAGCAATTAACATAAAACCACCTGCCCTATCACAA
MN199858	68	2016-11-28	Cola de Caballo	1	1	Osyris lanceolata	0	NA	465	Turdus viscivorus	99.78	COI-fsdF /COI-fsd-degR - COI-fsd-degF/COI-fsdR	GCATGAGCCGGAATAGTAGGCACTGCCCTAAGTCTCCTCATCCGAGCAGAACTAGGCCAACCAGGCGCCCTACTGGGTGACGACCAAATCTATAACGTAGTCGTTACTGCCCATGCTTTCGTAATAATCTTCTTCATAGTTATGCCAATTATAATTGGAGGGTTTGGAAACTGACTAGTCCCTCTAATAATCGGAGCCCCAGACATAGCATTCCCCCGAATAAACAACATAAGCTTCTGGCTACTTCCCCCATCCTTCCTCCTTCTCCTAGCCTCTTCCACAGTAGAAGCAGGGGCGGGAACAGGCTGAACCGTCTATCCACCCCTCGCTGGCAACTTAGCCCATGCAGGAGCTTCAGTAGACCTGGCCATCTTCTCCCTCCACCTGGCAGGTATTTCC…
MN199859	69	2016-11-28	Cola de Caballo	2	1	Osyris lanceolata	1	Daphne gnidium	300	Turdus viscivorus	99.66	COI-fsdF /COI-fsd-degR - COI-fsd-degF/COI-fsdR	GGAAACTGACTAGTCCCTCTAATAATCGGAGCCCCAGACATAGCATTCCCCCGAATAAACAACATAAGCTTCTGGCTACTTCCCCCATCCTTCCTCCTTCTCCTAGCCTCTTCCACAGTAGAAGCAGGGGCGGGAACAGGCTGAACCGTCTATCCACCCCTCGCTGGCAACTTAGCCCATGCAGGAGCTTCAGTAGACCTGGCCATCTTCTCCCTCCACCTGGCAGGTATTTCCTCAATTCTGGGGGCCATCAACTTCATTACAACAGCAATTAACATAAAACCACCTGCCCTATCACAA
MN199860	70	2016-11-28	Cola de Caballo	4	4	Asparagus albus	0	NA	220	Turdus viscivorus	99.53	COI-fsd-degF	CCCCCATCCTTCCTCCTTCTCCTAGCCTCTTCCACAGATAGAAGCAGGGGCGGGAACAGGCTGAACCGTCTATCCACCCCTCGCTGGCAACTTAGCCCATGCAGGAGCTTCAGTAGACCTGGCCATCTTCTCCCTCCACCTGGCAGGTATTTCCTCAATTCTGGGGGCCATCAACTTCATTACAACAGCAATTAACATAAAACCACCTGCCCTATCACAA
MN199861	71	2016-11-28	Escombreras	1	1	Asparagus albus	0	NA	220	Turdus viscivorus	99.53	COI-fsd-degF	CCCCCATCCTTCCTCCTTCTCCTAGCCTCTTCCACAGATAGAAGCAGGGGCGGGAACAGGCTGAACCGTCTATCCACCCCTCGCTGGCAACTTAGCCCATGCAGGAGCTTCAGTAGACCTGGCCATCTTCTCCCTCCACCTGGCAGGTATTTCCTCAATTCTGGGGGCCATCAACTTCATTACAACAGCAATTAACATAAAACCACCTGCCCTATCACAA
MN199862	72	2016-11-28	Escombreras	1	1	Asparagus albus	0	NA	220	Turdus viscivorus	99.53	COI-fsd-degF	CCCCCATCCTTCCTCCTTCTCCTAGCCTCTTCCACAGATAGAAGCAGGGGCGGGAACAGGCTGAACCGTCTATCCACCCCTCGCTGGCAACTTAGCCCATGCAGGAGCTTCAGTAGACCTGGCCATCTTCTCCCTCCACCTGGCAGGTATTTCCTCAATTCTGGGGGCCATCAACTTCATTACAACAGCAATTAACATAAAACCACCTGCCCTATCACAA
MN199863	73	2016-11-28	Cola de Caballo	1	1	Osyris lanceolata	0	NA	231	Turdus viscivorus	99.56	COI-fsd-degF	TTCTGGCTACTTCCCCCATCCTTCCTCCTTCTCCTAGCCTCTTCCACAGTAGAAGCAGGGGCGGGAACAGGCTGAACCGTCTATCCACCCCTCGCTGGCAACTTAGCCCATGCAGGAGCTTCAGTAGACCTGGCCATCTTCTCCCTCCACCTGGCAGGTATTTCCTCAATTCTGGGGGCCATCAACTTCATTACAACAGCAATTAACATAAAACCACCTGCCCTATCACAA
	74	2016-11-28	Cola de Caballo	2	2	Osyris lanceolata	0	NA	Does not amplify	Does not amplify	Does not amplify	Does not amplify	Does not amplify
	75	2016-11-28	Escombreras	2	2	Asparagus horridus	0	NA	Does not amplify	Does not amplify	Does not amplify	Does not amplify	Does not amplify
	76	2016-11-28	Escombreras	1	1	Asparagus albus	0	NA	Does not amplify	Does not amplify	Does not amplify	Does not amplify	Does not amplify
	77	2016-11-28	Escombreras	1	1	Asparagus albus	0	NA	Does not amplify	Does not amplify	Does not amplify	Does not amplify	Does not amplify
	78	2016-11-28	Escombreras	1	1	Asparagus albus	0	NA	Does not amplify	Does not amplify	Does not amplify	Does not amplify	Does not amplify
MN199864	79	2016-11-28	Escombreras	1	1	Asparagus horridus	0	NA	201	Turdus viscivorus	99.49	COI-fsd-degF	CTCCTAGCCTCTTCCACAGTAGAAGCAGGGGCGGGAACAGGCTGAACCGTCTATCCACCCCTCGCTGGCAACTTAGCCCATGCAGGAGCTTCAGTAGACCTGGCCATCTTCTCCCTCCACCTGGCAGGTATTTCCTCAATTCTGGGGGCCATCAACTTCATTACAACAGCAATTAACATAAAACCACCTGCCCTATCACAA
MN199865	80	2016-11-28	Escombreras	1	1	Asparagus albus	0	NA	201	Turdus viscivorus	99.49	COI-fsd-degF	CTCCTAGCCTCTTCCACAGTAGAAGCAGGGGCGGGAACAGGCTGAACCGTCTATCCACCCCTCGCTGGCAACTTAGCCCATGCAGGAGCTTCAGTAGACCTGGCCATCTTCTCCCTCCACCTGGCAGGTATTTCCTCAATTCTGGGGGCCATCAACTTCATTACAACAGCAATTAACATAAAACCACCTGCCCTATCACAA
MN199957	81	2016-11-28	Escombreras	2	2	Asparagus horridus	0	NA	209	Turdus viscivorus	99.5	COI-fsd-degF	TCCTCCTTCTCCTAGCCTCTTCCACAGTAGAAGCAGGGGCGGGAACAGGCTGAACCGTCTATCCACCCCTCGCTGGCAACTTAGCCCATGCAGGAGCTTCAGTAGACCTGGCCATCTTCTCCCTCCACCTGGCAGGTATTTCCTCAATTCTGGGGGCCATCAACTTCATTACAACAGCAATTAACATAAAACCACCTGCCCTATCACAA
MN199958	82	2016-11-28	Escombreras	1	1	Asparagus albus	0	NA	227	Turdus viscivorus	99.54	COI-fsd-degF	GGCTACTTCCCCCATCCTTCCTCCTTCTCCTAGCCTCTTCCACAGTAGAAGCAGGGGCGGGAACAGGCTGAACCGTCTATCCACCCCTCGCTGGCAACTTAGCCCATGCAGGAGCTTCAGTAGACCTGGCCATCTTCTCCCTCCACCTGGCAGGTATTTCCTCAATTCTGGGGGCCATCAACTTCATTACAACAGCAATTAACATAAAACCACCTGCCCTATCACAA
MN199907	83	2016-11-28	Escombreras	3	3	Asparagus albus	0	NA	235	Turdus merula	100	COI-fsd-degF	AAGCTTTTGACTCCTCCCCCCATCCTTCCTCCTCCTCCTAGCCTCCTCTACAGTAGAAGCTGGAGCAGGAACAGGTTGAACCGTCTATCCCCCCCTCGCCGGCAATCTAGCACATGCAGGGGCTTCAGTAGACTTAGCTATCTTCTCCCTACACCTCGCAGGAATCTCCTCAATCCTGGGGGCTATTAACTTCATCACAACAGCGATCAACATAAAACCACCTGCCCTATCACAA
MN199908	84	2016-11-28	Escombreras	1	1	Asparagus albus	0	NA	235	Turdus viscivorus	99.56	COI-fsd-degF	AAGCTTCTGGCTACTTCCCCCATCCTTCCTCCTTCTCCTAGCCTCTTCCACAGTAGAAGCAGGGGCGGGAACAGGCTGAACCGTCTATCCACCCCTCGCTGGCAACTTAGCCCATGCAGGAGCTTCAGTAGACCTGGCCATCTTCTCCCTCCACCTGGCAGGTATTTCCTCAATTCTGGGGGCCATCAACTTCATTACAACAGCAATTAACATAAAACCACCTGCCCTATCACAA
MN199909	85	2016-11-28	Escombreras	10	10	Lycium intrincatum	0	NA	235	Turdus viscivorus	99.56	COI-fsd-degF	AAGCTTCTGGCTACTTCCCCCATCCTTCCTCCTTCTCCTAGCCTCTTCCACAGTAGAAGCAGGGGCGGGAACAGGCTGAACCGTCTATCCACCCCTCGCTGGCAACTTAGCCCATGCAGGAGCTTCAGTAGACCTGGCCATCTTCTCCCTCCACCTGGCAGGTATTTCCTCAATTCTGGGGGCCATCAACTTCATTACAACAGCAATTAACATAAAACCACCTGCCCTATCACAA
MN199959	86	2016-11-28	Escombreras	1	1	Asparagus albus	0	NA	227	Turdus viscivorus	99.54	COI-fsd-degF	GGCTACTTCCCCCATCCTTCCTCCTTCTCCTAGCCTCTTCCACAGTAGAAGCAGGGGCGGGAACAGGCTGAACCGTCTATCCACCCCTCGCTGGCAACTTAGCCCATGCAGGAGCTTCAGTAGACCTGGCCATCTTCTCCCTCCACCTGGCAGGTATTTCCTCAATTCTGGGGGCCATCAACTTCATTACAACAGCAATTAACATAAAACCACCTGCCCTATCACAA
MN199960	87	2016-11-28	Escombreras	1	1	Asparagus albus	0	NA	227	Turdus viscivorus	99.54	COI-fsd-degF	GGCTACTTCCCCCATCCTTCCTCCTTCTCCTAGCCTCTTCCACAGTAGAAGCAGGGGCGGGAACAGGCTGAACCGTCTATCCACCCCTCGCTGGCAACTTAGCCCATGCAGGAGCTTCAGTAGACCTGGCCATCTTCTCCCTCCACCTGGCAGGTATTTCCTCAATTCTGGGGGCCATCAACTTCATTACAACAGCAATTAACATAAAACCACCTGCCCTATCACAA
MN199961	88	2016-11-28	Escombreras	1	1	Asparagus albus	0	NA	227	Turdus viscivorus	99.54	COI-fsd-degF	GGCTACTTCCCCCATCCTTCCTCCTTCTCCTAGCCTCTTCCACAGTAGAAGCAGGGGCGGGAACAGGCTGAACCGTCTATCCACCCCTCGCTGGCAACTTAGCCCATGCAGGAGCTTCAGTAGACCTGGCCATCTTCTCCCTCCACCTGGCAGGTATTTCCTCAATTCTGGGGGCCATCAACTTCATTACAACAGCAATTAACATAAAACCACCTGCCCTATCACAA
MN199962	89	2016-11-28	Escombreras	1	1	Asparagus albus	0	NA	227	Turdus viscivorus	99.54	COI-fsd-degF	GGCTACTTCCCCCATCCTTCCTCCTTCTCCTAGCCTCTTCCACAGTAGAAGCAGGGGCGGGAACAGGCTGAACCGTCTATCCACCCCTCGCTGGCAACTTAGCCCATGCAGGAGCTTCAGTAGACCTGGCCATCTTCTCCCTCCACCTGGCAGGTATTTCCTCAATTCTGGGGGCCATCAACTTCATTACAACAGCAATTAACATAAAACCACCTGCCCTATCACAA
MN199963	90	2016-11-28	Escombreras	2	2	Lycium intrincatum	0	NA	227	Turdus viscivorus	99.54	COI-fsd-degF	GGCTACTTCCCCCATCCTTCCTCCTTCTCCTAGCCTCTTCCACAGTAGAAGCAGGGGCGGGAACAGGCTGAACCGTCTATCCACCCCTCGCTGGCAACTTAGCCCATGCAGGAGCTTCAGTAGACCTGGCCATCTTCTCCCTCCACCTGGCAGGTATTTCCTCAATTCTGGGGGCCATCAACTTCATTACAACAGCAATTAACATAAAACCACCTGCCCTATCACAA
MN199964	91	2016-11-28	Escombreras	12	12	Lycium intrincatum	0	NA	227	Turdus viscivorus	99.54	COI-fsd-degF	GGCTACTTCCCCCATCCTTCCTCCTTCTCCTAGCCTCTTCCACAGTAGAAGCAGGGGCGGGAACAGGCTGAACCGTCTATCCACCCCTCGCTGGCAACTTAGCCCATGCAGGAGCTTCAGTAGACCTGGCCATCTTCTCCCTCCACCTGGCAGGTATTTCCTCAATTCTGGGGGCCATCAACTTCATTACAACAGCAATTAACATAAAACCACCTGCCCTATCACAA
MN199965	92	2016-11-28	Escombreras	2	2	Lycium intrincatum	0	NA	227	Turdus viscivorus	99.54	COI-fsd-degF	GGCTACTTCCCCCATCCTTCCTCCTTCTCCTAGCCTCTTCCACAGTAGAAGCAGGGGCGGGAACAGGCTGAACCGTCTATCCACCCCTCGCTGGCAACTTAGCCCATGCAGGAGCTTCAGTAGACCTGGCCATCTTCTCCCTCCACCTGGCAGGTATTTCCTCAATTCTGGGGGCCATCAACTTCATTACAACAGCAATTAACATAAAACCACCTGCCCTATCACAA
MN199910	93	2016-11-28	Escombreras	3	3	Asparagus albus	0	NA	250	Turdus merula	100	COI-fsdF /COI-fsd-degR	AAGCTTTTGACTCCTCCCCCCATCCTTCCTCCTCCTCCTAGCCTCCTCTACAGTAGAAGCTGGGGCAGGAACAGGTTGAACCGTCTATCCTCCCCTCGCCGGCAATCTAGCACATGCAGGGGCTTCAGTAGACTTAGCCATCTTCTCCCTACACCTCGCAGGAATCTCCTCAATCCTGGGGGCTATTAACTTCATCACAACAGCGATCAACATAAAACCACCTGCCCTATCACAA
MN199966	94	2016-11-28	Escombreras	1	1	Lycium intrincatum	0	NA	227	Turdus viscivorus	99.54	COI-fsd-degF	GGCTACTTCCCCCATCCTTCCTCCTTCTCCTAGCCTCTTCCACAGTAGAAGCAGGGGCGGGAACAGGCTGAACCGTCTATCCACCCCTCGCTGGCAACTTAGCCCATGCAGGAGCTTCAGTAGACCTGGCCATCTTCTCCCTCCACCTGGCAGGTATTTCCTCAATTCTGGGGGCCATCAACTTCATTACAACAGCAATTAACATAAAACCACCTGCCCTATCACAA
MN199967	95	2016-11-28	Escombreras	2	2	Lycium intrincatum	0	NA	227	Turdus viscivorus	99.54	COI-fsd-degF	GGCTACTTCCCCCATCCTTCCTCCTTCTCCTAGCCTCTTCCACAGTAGAAGCAGGGGCGGGAACAGGCTGAACCGTCTATCCACCCCTCGCTGGCAACTTAGCCCATGCAGGAGCTTCAGTAGACCTGGCCATCTTCTCCCTCCACCTGGCAGGTATTTCCTCAATTCTGGGGGCCATCAACTTCATTACAACAGCAATTAACATAAAACCACCTGCCCTATCACAA
MN199911	96	2016-11-28	Escombreras	20	20	Lycium intrincatum	0	NA	235	Turdus viscivorus	99.56	COI-fsd-degF	AAGCTTCTGGCTACTTCCCCCATCCTTCCTCCTTCTCCTAGCCTCTTCCACAGTAGAAGCAGGGGCGGGAACAGGCTGAACCGTCTATCCACCCCTCGCTGGCAACTTAGCCCATGCAGGAGCTTCAGTAGACCTGGCCATCTTCTCCCTCCACCTGGCAGGTATTTCCTCAATTCTGGGGGCCATCAACTTCATTACAACAGCAATTAACATAAAACCACCTGCCCTATCACAA
MN199912	97	2016-11-28	Escombreras	5	5	Lycium intrincatum	0	NA	235	Turdus viscivorus	99.56	COI-fsd-degF	AAGCTTCTGGCTACTTCCCCCATCCTTCCTCCTTCTCCTAGCCTCTTCCACAGTAGAAGCAGGGGCGGGAACAGGCTGAACCGTCTATCCACCCCTCGCTGGCAACTTAGCCCATGCAGGAGCTTCAGTAGACCTGGCCATCTTCTCCCTCCACCTGGCAGGTATTTCCTCAATTCTGGGGGCCATCAACTTCATTACAACAGCAATTAACATAAAACCACCTGCCCTATCACAA
MN199866	98	2016-11-28	Escombreras	16	16	Lycium intrincatum	0	NA	273	Turdus viscivorus	99.63	COI-fsd-degF/COI-fsdR	GGAGCCCCAGACATAGCATTCCCCCGAATAAACAACATAAGCTTCTGGCTACTTCCCCCATCCTTCCTCCTTCTCCTAGCCTCTTCCACAGTAGAAGCAGGGGCGGGAACAGGCTGAACCGTCTATCCACCCCTCGCTGGCAACTTAGCCCATGCAGGAGCTTCAGTAGACCTGGCCATCTTCTCCCTCCACCTGGCAGGTATTTCCTCAATTCTGGGGGCCATCAACTTCATTACAACAGCAATTAACATAAAACCACCTGCCCTATCACAA
MN199913	99	2016-11-28	Escombreras	1	1	Lycium intrincatum	0	NA	235	Turdus viscivorus	99.56	COI-fsd-degF	AAGCTTCTGGCTACTTCCCCCATCCTTCCTCCTTCTCCTAGCCTCTTCCACAGTAGAAGCAGGGGCGGGAACAGGCTGAACCGTCTATCCACCCCTCGCTGGCAACTTAGCCCATGCAGGAGCTTCAGTAGACCTGGCCATCTTCTCCCTCCACCTGGCAGGTATTTCCTCAATTCTGGGGGCCATCAACTTCATTACAACAGCAATTAACATAAAACCACCTGCCCTATCACAA
MN199914	100	2016-11-28	Cola de Caballo	1	1	Pistacia lentiscus	0	NA	264	Erithacus rubecula	99.62	COI-fsd-degF/COI-fsdR	TGGAGCCCCAGACATAGCATTCCCCCGAATAAACAACATAAGCTTCTGACTACTCCCCCCATCCTTCCTTCTTCTCCTAGCCTCCTCTACAGTTGAAGCCGGAGCCGGGACAGGCTGAACCGTATATCCACCTCTAGCCGGCAACCTGGCCCACGCCGGAGCCTCAGTAGACCTGGCCATCTTCTCCCTCCACCTAGCAGGTATTTCCTCAATCCTAGGTGCCATCAATTTCATCACAACCGCCATTAACATAAAACCACCTGC
MN199867	101	2016-11-28	Cola de Caballo	1	1	Osyris lanceolata	0	NA	201	Turdus viscivorus	99.49	COI-fsd-degF	CTCCTAGCCTCTTCCACAGTAGAAGCAGGGGCGGGAACAGGCTGAACCGTCTATCCACCCCTCGCTGGCAACTTAGCCCATGCAGGAGCTTCAGTAGACCTGGCCATCTTCTCCCTCCACCTGGCAGGTATTTCCTCAATTCTGGGGGCCATCAACTTCATTACAACAGCAATTAACATAAAACCACCCGCCCTCTCACAA
MN199968	102	2016-11-28	Cola de Caballo	1	1	Osyris lanceolata	0	NA	228	Turdus viscivorus	99.54	COI-fsd-degF	GGCTACTTCCCCCATCCTTCCTCCTTCTCCTAGCCTCTTCCACAGATAGAAGCAGGGGCGGGAACAGGCTGAACCGTCTATCCACCCCTCGCTGGCAACTTAGCCCATGCAGGAGCTTCAGTAGACCTGGCCATCTTCTCCCTCCACCTGGCAGGTATTTCCTCAATTCTGGGGGCCATCAACTTCATTACAACAGCAATTAACATAAAACCACCTGCCCTATCACAA
MN199969	103	2016-11-28	Cola de Caballo	1	1	Osyris lanceolata	0	NA	228	Turdus viscivorus	99.54	COI-fsd-degF	GGCTACTTCCCCCATCCTTCCTCCTTCTCCTAGCCTCTTCCACAGATAGAAGCAGGGGCGGGAACAGGCTGAACCGTCTATCCACCCCTCGCTGGCAACTTAGCCCATGCAGGAGCTTCAGTAGACCTGGCCATCTTCTCCCTCCACCTGGCAGGTATTTCCTCAATTCTGGGGGCCATCAACTTCATTACAACAGCAATTAACATAAAACCACCTGCCCTATCACAA
MN199915	104	2016-11-28	Cola de Caballo	1	1	Osyris lanceolata	0	NA	184	Turdus viscivorus	99.43	COI-fsd-degF	GATAGAAGCAGGGGCGGGAACAGGCTGAACCGTCTATCCACCCCTCGCTGGCAACTTAGCCCATGCAGGAGCTTCAGTAGACCTGGCCATCTTCTCCCTCCACCTGGCAGGTATTTCCTCAATTCTGGGGGCCATCAACTTCATTACAACAGCAATTAACATAAAACCACCTGCCCTATCACAA
MN199916	105	2016-09-14	Cola de Caballo	1	1	Rhamnus alaternus	0	NA	215	Turdus viscivorus	99.52	COI-fsd-degF	ATCCTTCCTCCTTCTCCTAGCCTCTTCCACAGATAGAAGCAGGGGCGGGAACAGGCTGAACCGTCTATCCACCCCTCGCTGGCAACTTAGCCCATGCAGGAGCTTCAGTAGACCTGGCCATCTTCTCCCTCCACCTGGCAGGTATTTCCTCAATTCTGGGGGCCATCAACTTCATTACAACAGCAATTAACATAAAACCACCTGCCCTATCACAA
MN199970	106	2016-09-14	Cola de Caballo	5	5	Ficus carica	0	NA	228	Turdus viscivorus	99.54	COI-fsd-degF	GGCTACTTCCCCCATCCTTCCTCCTTCTCCTAGCCTCTTCCACAGATAGAAGCAGGGGCGGGAACAGGCTGAACCGTCTATCCACCCCTCGCTGGCAACTTAGCCCATGCAGGAGCTTCAGTAGACCTGGCCATCTTCTCCCTCCACCTGGCAGGTATTTCCTCAATTCTGGGGGCCATCAACTTCATTACAACAGCAATTAACATAAAACCACCTGCCCTATCACAA
MN199917	107	2016-09-14	Cola de Caballo	5	5	Ficus carica	0	NA	214	Turdus viscivorus	99.52	COI-fsd-degF	ATCCTTCCTCCTTCTCCTAGCCTCTTCCACAGTAGAAGCAGGGGCGGGAACAGGCTGAACCGTCTATCCACCCCTCGCTGGCAACTTAGCCCATGCAGGAGCTTCAGTAGACCTGGCCATCTTCTCCCTCCACCTGGCAGGTATTTCCTCAATTCTGGGGGCCATCAACTTCATTACAACAGCAATTAACATAAAACCACCTGCCCTATCACAA
MN199868	108	2016-12-29	Escombreras	1	1	Withania frutescens	0	NA	237	Phoenicurus ochruros	99.12	COI-fsd-degF	ATAAGCTTCTGACTTCTTCCCCCATCCTTTCTACTCCTCCTAGCCTCTTCCACCGTTGAAGCAGGGGCAGGAACAGGCTGAACTGTATATCCTCCTCTCGCCGGTAACTTAGCCCATGCCGGAGCTTCAGTAGACCTAGCCATCTTCTCCCTTCACCTAGCAGGTATCTCCTCCATCCTGGGCGCTATCAACTTCATCACCACAGCAATTAACATAAAACCACCTGCCCTATCACAA
MN199869	109	2016-12-29	Escombreras	1	1	Withania frutescens	0	NA	273	Turdus viscivorus	99.63	COI-fsd-degF/COI-fsdR	GGAGCCCCAGACATAGCATTCCCCCGAATAAACAACATAAGCTTCTGGCTACTTCCCCCATCCTTCCTCCTTCTCCTAGCCTCTTCCACAGTAGAAGCAGGGGCGGGAACAGGCTGAACCGTCTATCCACCCCTCGCTGGCAACTTAGCCCATGCAGGAGCTTCAGTAGACCTGGCCATCTTCTCCCTCCACCTGGCAGGTATTTCCTCAATTCTGGGGGCCATCAACTTCATTACAACAGCAATTAACATAAAACCACCTGCCCTATCACAA
MN199918	110	2016-12-29	Escombreras	1	1	Asparagus albus	0	NA	229	Turdus viscivorus	99.55	COI-fsd-degF	CTGGCTACTTCCCCCATCCTTCCTCCTTCTCCTAGCCTCTTCCACAGTAGAAGCAGGGGCGGGAACAGGCTGAACCGTCTATCCACCCCTCGCTGGCAACTTAGCCCATGCAGGAGCTTCAGTAGACCTGGCCATCTTCTCCCTCCACCTGGCAGGTATTTCCTCAATTCTGGGGGCCATCAACTTCATTACAACAGCAATTAACATAAAACCACCTGCCCTATCACAA
MN199870	111	2016-12-29	Escombreras	1	1	Asparagus albus	0	NA	266	Phoenicurus ochruros	99.62	COI-fsd-degF/COI-fsdR	GGAGCCCCAGACATAGCATTCCCCCGAATAAATAACATAAGCTTCTGACTTCTTCCCCCATCCTTTCTACTCCTCCTAGCCTCTTCCACCGTTGAAGCAGGGGCAGGAACAGGCTGAACTGTATATCCTCCTCTCGCCGGTAACTTAGCCCATGCCGGAGCTTCAGTAGACCTAGCCATCTTCTCCCTTCACCTAGCAGGTATCTCCTCCATCCTGGGCGCTATCAACTTCATCACCACAGCAATTAACATAAAACCACCTGCCCT
MN199919	112	2016-12-29	Escombreras	1	1	Asparagus albus	0	NA	205	Turdus viscivorus	99.49	COI-fsd-degF	CCTTCTCCTAGCCTCTTCCACAGTAGAAGCAGGGGCGGGAACAGGCTGAACCGTCTATCCACCCCTCGCTGGCAACTTAGCCCATGCAGGAGCTTCAGTAGACCTGGCCATCTTCTCCCTCCACCTGGCAGGTATTTCCTCAATTCTGGGGGCCATCAACTTCATTACAACAGCAATTAACATAAAACCACCTGCCCTATCACAA
MN199920	113	2016-12-29	Escombreras	1	1	Withania frutescens	0	NA	235	Turdus viscivorus	99.56	COI-fsd-degF	AAGCTTCTGGCTACTTCCCCCATCCTTCCTCCTTCTCCTAGCCTCTTCCACAGTAGAAGCAGGGGCGGGAACAGGCTGAACCGTCTATCCACCCCTCGCTGGCAACTTAGCCCATGCAGGAGCTTCAGTAGACCTGGCCATCTTCTCCCTCCACCTGGCAGGTATTTCCTCAATTCTGGGGGCCATCAACTTCATTACAACAGCAATTAACATAAAACCACCTGCCCTATCACAA
MN199971	114	2016-12-29	Escombreras	1	1	Withania frutescens	0	NA	226	Phoenicurus ochruros	100	COI-fsdF /COI-fsd-degR	ATGCATGAGCCGGAATAGTGGGTACCGCCCTAAGCCTCCTCATCCGAGCAGAACTGGGCCAACCTGGCGCCCTACTGGGAGACGACCAAGTCTACAACGTAGTCGTCACAGCCCATGCTTTTGTCATAATCTTCTTCATAGTTATGCCAATCATAATCGGAGGGTTTGGAAACTGACTAGTTCCTCTAATAATCGGAGCCCCAGACATAGCATTCCCCCGAATAAA
MN199921	115	2016-12-29	Escombreras	1	1	Withania frutescens	0	NA	236	Turdus viscivorus	99.56	COI-fsd-degF	AAGCTTCTGGCTACTTCCCCCATCCTTCCTCCTCCTCCTAGCCTCTTCCACAGTAGAAGCAGGGGCGGGAACAGGCTGAACCGTCTATCCACCCCTCGCTGGCAACTTAGCCCATGCAGGAGCTTCAGTAGACCTGGCCATCTTCTCCCTCCACCTGGCAGGTATTTCCTCAATTCTGGGGGCCATCAACTTCATTACAACAGCAATTAACATAAAACCACCTGCCCTATCACAA
MN199972	116	2016-12-29	Escombreras	7	7	Lycium intrincatum	0	NA	236	Sylvia melanocepaha	100	COI-fsd-degF	TAAGCTTCTGACTACTTCCCCCATCATTCCTCCTCCTACTAGCCTCCTCCACAGTAGAAGCCGGTGTGGGCACAGGATGAACTGTCTACCCCCCACTAGCCGGCAACCTGGCCCATGCCGGAGCCTCAGTAGACCTGGCCATTTTCTCCCTCCACCTTGCAGGAATCTCATCCATCCTAGGAGCAATCAACTTCATCACAACAGCAATCAACATAAAACCACCTGCCCTATCACAA
MN199922	117	2016-12-29	Escombreras	1	1	Asparagus albus	0	NA	235	Turdus viscivorus	99.56	COI-fsd-degF	AAGCTTCTGGCTACTTCCCCCATCCTTCCTCCTCCTCCTAGCCTCTTCCACAGTAGAAGCAGGGGCGGGAACAGGCTGAACCGTCTATCCACCCCTCGCTGGCAACTTAGCCCATGCAGGAGCTTCAGTAGACCTGGCCATCTTCTCCCTCCACCTGGCAGGTATTTCCTCAATTCTGGGGGCCATCAACTTCATTACAACAGCAATTAACATAAAACCACCTGCCCTATCACAA
MN199871	118	2016-12-29	Escombreras	1	1	Withania frutescens	0	NA	266	Phoenicurus ochruros	99.62	COI-fsd-degF/COI-fsdR	GGAGCCCCAGACATAGCATTCCCCCGAATAAATAACATAAGCTTCTGACTTCTTCCCCCATCCTTTCTACTCCTCCTAGCCTCTTCCACCGTTGAAGCAGGGGCAGGAACAGGCTGAACTGTATATCCTCCTCTCGCCGGTAACTTAGCCCATGCCGGAGCTTCAGTAGACCTAGCCATCTTCTCCCTTCACCTAGCAGGTATCTCCTCCATCCTGGGCGCTATCAACTTCATCACCACAGCAATTAACATAAAACCACCTGCCCT
MN199923	119	2016-12-29	Escombreras	2	2	Withania frutescens	0	NA	230	Phoenicurus ochruros	100	COI-fsdF /COI-fsd-degR	TGCATGAGCCGGAATAGTGGGTACCGCCCTAAGCCTCCTCATCCGAGCAGAACTGGGCCAACCTGGCGCCCTACTGGGAGACGACCAAGTCTACAACGTAGTCGTCACAGCCCATGCTTTTGTCATAATCTTCTTCATAGTTATGCCAATCATAATCGGAGGGTTTGGAAACTGACTAGTTCCTCTAATAATCGGAGCCCCAGACATAGCATTCCCCCGAATAAACAACA
MN199924	120	2016-12-29	Escombreras	4	4	Withania frutescens	0	NA	230	Phoenicurus ochruros	100	COI-fsdF /COI-fsd-degR	TGCATGAGCCGGAATAGTNGGTACCGCCCTAAGCCTCCTCATCCGAGCAGAACTGGGCCAACCTGGCGCCCTACTGGGAGACGACCAAGTCTACAACGTAGTCGTCACAGCCCATGCTTTTGTCATAATCTTCTTCATAGTTATGCCAATCATAATCGGAGGGTTTGGAAACTGACTAGTTCCTCTAATAATCGGAGCCCCAGACATAGCATTCCCCCGAATAAACAACA
MN199925	121	2016-12-29	Escombreras	1	1	Withania frutescens	0	NA	235	Turdus viscivorus	99.56	COI-fsd-degF	AAGCTTCTGGCTACTTCCCCCATCCTTCCTCCTTCTCCTAGCCTCTTCCACAGTAGAAGCAGGGGCGGGAACAGGCTGAACCGTCTATCCACCCCTCGCTGGCAACTTAGCCCATGCAGGAGCTTCAGTAGACCTGGCCATCTTCTCCCTCCACCTGGCAGGTATTTCCTCAATTCTGGGGGCCATCAACTTCATTACAACAGCAATTAACATAAAACCACCTGCCCTATCACAA
MN199872	122	2016-12-29	Escombreras	1	1	Withania frutescens	0	NA	266	Phoenicurus ochruros	99.62	COI-fsd-degF/COI-fsdR	GGAGCCCCAGACATAGCATTCCCCCGAATAAATAACATAAGCTTCTGACTTCTTCCCCCATCCTTTCTACTCCTCCTAGCCTCTTCCACCGTTGAAGCAGGGGCAGGAACAGGCTGAACTGTATATCCTCCTCTCGCCGGTAACTTAGCCCATGCCGGAGCTTCAGTAGACCTAGCCATCTTCTCCCTTCACCTAGCAGGTATCTCCTCCATCCTGGGCGCTATCAACTTCATCACCACAGCAATTAACATAAAACCACCTGCCCT
MN199926	123	2016-12-29	Escombreras	5	5	Withania frutescens	0	NA	235	Turdus viscivorus	99.56	COI-fsd-degF	AAGCTTCTGGCTACTTCCCCCATCCTTCCTCCTCCTCCTAGCCTCTTCCACAGTAGAAGCAGGGGCGGGAACAGGCTGAACCGTCTATCCACCCCTCGCTGGCAACTTAGCCCATGCAGGAGCTTCAGTAGACCTGGCCATCTTCTCCCTCCACCTGGCAGGTATTTCCTCAATTCTGGGGGCCATCAACTTCATTACAACAGCAATTAACATAAAACCACCTGCCCTATCACAA
	124	2016-12-29	Escombreras	3	2	Asparagus albus	1	Lycium intricatum	Does not amplify	Does not amplify	Does not amplify	Does not amplify	Does not amplify
MN199927	125	2016-12-29	Escombreras	3	3	Withania frutescens	0	NA	235	Phoenicurus ochruros	99.55	COI-fsd-degF	AAGCTTCTGACTTCTTCCCCCATCCTTTCTACTCCTCCTAGCCTCTTCCACCGTTGAAGCAGGGGCAGGAACAGGCTGAACTGTATATCCTCCTCTCGCCGGTAACTTAGCCCATGCCGGAGCTTCAGTAGACCTAGCCATCTTCTCCCTTCACCTAGCAGGTATCTCCTCCATCCTGGGCGCTATCAACTTCATCACCACAGCAATTAACATAAAACCACCTGC
MN199928	126	2016-12-29	Escombreras	2	2	Withania frutescens	0	NA	235	Turdus viscivorus	99.56	COI-fsd-degF	AAGCTTCTGGCTACTTCCCCCATCCTTCCTCCTCCTCCTAGCCTCTTCCACAGTAGAAGCAGGGGCGGGAACAGGCTGAACCGTCTATCCACCCCTCGCTGGCAACTTAGCCCATGCAGGAGCTTCAGTAGACCTGGCCATCTTCTCCCTCCACCTGGCAGGTATTTCCTCAATTCTGGGGGCCATCAACTTCATTACAACAGCAATTAACATAAAACCACCTGCCCTATCACAA
	127	2016-12-29	Escombreras	6	6	Withania frutescens	0	NA	Does not amplify	Does not amplify	Does not amplify	Does not amplify	Does not amplify
MN199973	128	2016-12-29	Cola de caballo	3	2	Pistacia lentiscus	1	Osyris lanceolata	227	Turdus viscivorus	99.54	COI-fsd-degF	GGCTACTTCCCCCATCCTTCCTCCTTCTCCTAGCCTCTTCCACAGTAGAAGCAGGGGCGGGAACAGGCTGAACCGTCTATCCACCCCTCGCTGGCAACTTAGCCCATGCAGGAGCTTCAGTAGACCTGGCCATCTTCTCCCTCCACCTGGCAGGTATTTCCTCAATTCTGGGGGCCATCAACTTCATTACAACAGCAATTAACATAAAACCACCTGCCCTATCACAA
MN199929	129	2016-12-29	Gorguel	1	1	Osyris lanceolata	0	NA	235	Turdus viscivorus	99.56	COI-fsd-degF	AAGCTTCTGGCTACTTCCCCCATCCTTCCTCCTTCTCCTAGCCTCTTCCACAGTAGAAGCAGGGGCGGGAACAGGCTGAACCGTCTATCCACCCCTCGCTGGCAACTTAGCCCATGCAGGAGCTTCAGTAGACCTGGCCATCTTCTCCCTCCACCTGGCAGGTATTTCCTCAATTCTGGGGGCCATCAACTTCATTACAACAGCAATTAACATAAAACCACCTGCCCTATCACAA
MN199873	130	2016-12-29	Gorguel	1	1	Pistacia lentiscus	0	NA	186	Turdus philomelos	99.44	COI-fsd-degF	ACAGTAGAAGCGGGAGCAGGAACGGGCTGAACTGTTTATCCCCCCCTCGCCGGCAACCTAGCACACGCAGGAGCTTCAGTAGACCTGGCCATCTTCTCCCTCCACCTGGCAGGAATCTCCTCAATCCTGGGGGCTATCAACTTCATCACAACAGCAATTAACATAAAACCACCTGCCCTCTCACAA
MN199930	131	2016-12-29	Gorguel	1	1	Pistacia lentiscus	0	NA	235	Turdus viscivorus	99.56	COI-fsd-degF	AAGCTTCTGGCTACTTCCCCCATCCTTCCTCCTTCTCCTAGCCTCTTCCACAGTAGAAGCAGGGGCGGGAACAGGCTGAACCGTCTATCCACCCCTCGCTGGCAACTTAGCCCATGCAGGAGCTTCAGTAGACCTGGCCATCTTCTCCCTCCACCTGGCAGGTATTTCCTCAATTCTGGGGGCCATCAACTTCATTACAACAGCAATTAACATAAAACCACCTGCCCTATCACAA
MN199931	132	2016-12-29	Gorguel	2	2	Pistacia lentiscus	0	NA	235	Sylvia melanocepaha	100	COI-fsd-degF	AAGCTTCTGACTACTTCCCCCATCATTCCTCCTCCTACTAGCCTCCTCCACAGTAGAAGCTGGTGTGGGCACAGGATGAACTGTCTACCCCCCACTAGCCGGCAACCTGGCCCATGCCGGAGCCTCAGTAGACCTGGCCATTTTCTCCCTCCACCTTGCAGGAATCTCATCCATCCTAGGAGCAATCAACTTCATCACAACAGCAATCAACATAAAACCACCTGCCCTATCACAA
MN199932	133	2016-12-29	Gorguel	1	1	Pistacia lentiscus	0	NA	235	Turdus viscivorus	99.56	COI-fsd-degF	AAGCTTCTGGCTACTTCCCCCATCCTTCCTCCTCCTCCTAGCCTCTTCCACAGTAGAAGCAGGGGCGGGAACAGGCTGAACCGTCTATCCACCCCTCGCTGGCAACTTAGCCCATGCAGGAGCTTCAGTAGACCTGGCCATCTTCTCCCTCCACCTGGCAGGTATTTCCTCAATTCTGGGGGCCATCAACTTCATTACAACAGCAATTAACATAAAACCACCTGCCCTATCACAA
MN199874	134	2016-12-29	Cola de caballo	1	1	Pistacia lentiscus	0	NA	222	Turdus viscivorus	99.54	COI-fsd-degF	CTTCCCCCATCCTTCCTCCTTCTCCTAGCCTCTTCCACAGTAGAAGCAGGGGCGGGAACAGGCTGAACCGTCTATCCACCCCTCGCTGGCAACTTAGCCCATGCAGGAGCTTCAGTAGACCTGGCCATCTTCTCCCTCCACCTGGCAGGTATTTCCTCAATTCTGGGGGCCATCAACTTCATTACAACAGCAATTAACATAAAACCACCTGCCCTATCACAA
MN199974	135	2016-12-29	Cola de caballo	1	1	Daphne gnidium	0	NA	230	Turdus viscivorus	99.55	COI-fsd-degF	TCTGGCTACTTCCCCCATCCTTCCTCCTTCTCCTAGCCTCTTCCACAGTAGAAGCAGGGGCGGGAACAGGCTGAACCGTCTATCCACCCCTCGCTGGCAACTTAGCCCATGCAGGAGCTTCAGTAGACCTGGCCATCTTCTCCCTCCACCTGGCAGGTATTTCCTCAATTCTGGGGGCCATCAACTTCATTACAACAGCAATTAACATAAAACCACCTGCCCTATCACAA
MN199875	136	2016-12-29	Cola de caballo	1	1	Pistacia lentiscus	0	NA	231	Turdus viscivorus	99.56	COI-fsd-degF	TTCTGGCTACTTCCCCCATCCTTCCTCCTTCTCCTAGCCTCTTCCACAGTAGAAGCAGGGGCGGGAACAGGCTGAACCGTCTATCCACCCCTCGCTGGCAACTTAGCCCATGCAGGAGCTTCAGTAGACCTGGCCATCTTCTCCCTCCACCTGGCAGGTATTTCCTCAATTCTGGGGGCCATCAACTTCATTACAACAGCAATTAACATAAAACCACCTGCCCTATCACAA
MN199975	137	2016-12-29	Cola de caballo	1	1	Osyris lanceolata	0	NA	230	Turdus viscivorus	99.55	COI-fsd-degF	TCTGGCTACTTCCCCCATCCTTCCTCCTTCTCCTAGCCTCTTCCACAGTAGAAGCAGGGGCGGGAACAGGCTGAACCGTCTATCCACCCCTCGCTGGCAACTTAGCCCATGCAGGAGCTTCAGTAGACCTGGCCATCTTCTCCCTCCACCTGGCAGGTATTTCCTCAATTCTGGGGGCCATCAACTTCATTACAACAGCAATTAACATAAAACCACCTGCCCTATCACAA
MN199876	138	2016-12-29	Cola de caballo	1	1	Osyris lanceolata	0	NA	240	Sylvia atricapilla	100	COI-fsd-degF	AATATAAGCTTCTGACTACTACCCCCATCATTCCTCCTACTTCTAGCCTCCTCCACAGTAGAAGCCGGAGCAGGAACAGGATGAACCGTATACCCACCCCTAGCCGGCAACCTAGCCCATGCTGGAGCCTCAGTTGACCTGGCTATCTTCTCTCTCCACCTAGCAGGTATTTCATCTATCCTCGGAGCTATCAACTTCATCACAACAGCAATTAACATAAAACCACCTGCCCTATCACAA
MN199976	139	2016-12-29	Escombreras	1	1	Withania frutescens	0	NA	236	Turdus viscivorus	99.56	COI-fsd-degF	TAAGCTTCTGGCTACTTCCCCCATCCTTCCTCCTTCTCCTAGCCTCTTCCACAGTAGAAGCAGGGGCGGGAACAGGCTGAACCGTCTATCCACCCCTCGCTGGCAACTTAGCCCATGCAGGAGCTTCAGTAGACCTGGCCATCTTCTCCCTCCACCTGGCAGGTATTTCCTCAATTCTGGGGGCCATCAACTTCATTACAACAGCAATTAACATAAAACCACCTGCCCTATCACAA
MN199933	140	2016-12-29	Escombreras	1	1	Asparagus horridus	0	NA	202	Turdus viscivorus	99.49	COI-fsd-degF	TCTCCTAGCCTCTTCCACAGTAGAAGCAGGGGCGGGAACAGGCTGAACCGTCTATCCACCCCTCGCTGGCAACTTAGCCCATGCAGGAGCTTCAGTAGACCTGGCCATCTTCTCCCTCCACCTGGCAGGTATTTCCTCAATTCTGGGGGCCATCAACTTCATTACAACAGCAATTAACATAAAACCACCTGCCCTATCACAA
MN199877	141	2016-12-29	Escombreras	1	1	Asparagus albus	0	NA	231	Turdus viscivorus	99.56	COI-fsd-degF	TTCTGGCTACTTCCCCCATCCTTCCTCCTTCTCCTAGCCTCTTCCACAGTAGAAGCAGGGGCGGGAACAGGCTGAACCGTCTATCCACCCCTCGCTGGCAACTTAGCCCATGCAGGAGCTTCAGTAGACCTGGCCATCTTCTCCCTCCACCTGGCAGGTATTTCCTCAATTCTGGGGGCCATCAACTTCATTACAACAGCAATTAACATAAAACCACCTGCCCTATCACAA
MN199934	142	2016-12-29	Escombreras	4	4	Asparagus albus	0	NA	235	Turdus viscivorus	99.56	COI-fsd-degF	AAGCTTCTGGCTACTTCCCCCATCCTTCCTCCTTCTCCTAGCCTCTTCCACAGTAGAAGCAGGGGCGGGAACAGGCTGAACCGTCTATCCACCCCTCGCTGGCAACTTAGCCCATGCAGGAGCTTCAGTAGACCTGGCCATCTTCTCCCTCCACCTGGCAGGTATTTCCTCAATTCTGGGGGCCATCAACTTCATTACAACAGCAATTAACATAAAACCACCTGCCCTATCACAA
MN199878	143	2016-12-29	Escombreras	1	1	Asparagus albus	0	NA	174	Turdus viscivorus	99.4	COI-fsd-degF	GGGGCGGGAACAGGCTGAACCGTCTATCCACCCCTCGCTGGCAACTTAGCCCATGCAGGAGCTTCAGTAGACCTGGCCATCTTCTCCCTCCACCTGGCAGGTATTTCCTCAATTCTGGGGGCCATCAACTTCATTACAACAGCAATTAACATAAAACCACCTGCCCTATCACAA
MN199879	144	2016-12-29	Escombreras	1	1	Lycium intrincatum	0	NA	201	Turdus viscivorus	99.49	COI-fsd-degF	CTCCTAGCCTCTTCCACAGTAGAAGCAGGGGCGGGAACAGGCTGAACCGTCTATCCACCCCTCGCTGGCAACTTAGCCCATGCAGGAGCTTCAGTAGACCTGGCCATCTTCTCCCTCCACCTGGCAGGTATTTCCTCAATTCTGGGGGCCATCAACTTCATTACAACAGCAATTAACATAAAACCACCTGCCCTATCACAA
MN199935	145	2016-12-29	Escombreras	1	1	Asparagus albus	0	NA	235	Turdus viscivorus	99.56	COI-fsd-degF	AAGCTTCTGGCTACTTCCCCCATCCTTCCTCCTCCTCCTAGCCTCTTCCACAGTAGAAGCAGGGGCGGGAACAGGCTGAACCGTCTATCCACCCCTCGCTGGCAACTTAGCCCATGCAGGAGCTTCAGTAGACCTGGCCATCTTCTCCCTCCACCTGGCAGGTATTTCCTCAATTCTGGGGGCCATCAACTTCATTACAACAGCAATTAACATAAAACCACCTGCCCTATCACAA
MN199880	146	2016-12-29	Escombreras	1	1	Withania frutescens	0	NA	273	Turdus viscivorus	99.63	COI-fsd-degF	GGAGCCCCAGACATAGCATTCCCCCGAATAAACAACATAAGCTTCTGGCTACTTCCCCCATCCTTCCTCCTTCTCCTAGCCTCTTCCACAGTAGAAGCAGGGGCGGGAACAGGCTGAACCGTCTATCCACCCCTCGCTGGCAACTTAGCCCATGCAGGAGCTTCAGTAGACCTGGCCATCTTCTCCCTCCACCTGGCAGGTATTTCCTCAATTCTGGGGGCCATCAACTTCATTACAACAGCAATTAACATAAAACCACCTGCCCTATCACAA
MN199936	147	2016-12-29	Escombreras	9	9	Withania frutescens	0	NA	235	Turdus viscivorus	99.56	COI-fsd-degF	AAGCTTCTGGCTACTTCCCCCATCCTTCCTCCTCCTCCTAGCCTCTTCCACAGTAGAAGCAGGGGCGGGAACAGGCTGAACCGTCTATCCACCCCTCGCTGGCAACTTAGCCCATGCAGGAGCTTCAGTAGACCTGGCCATCTTCTCCCTCCACCTGGCAGGTATTTCCTCAATTCTGGGGGCCATCAACTTCATTACAACAGCAATTAACATAAAACCACCTGCCCTATCACAA
	148	2016-12-29	Escombreras	2	2	Withania frutescens	0	NA	Does not amplify	Does not amplify	Does not amplify	Does not amplify	Does not amplify
MN199977	149	2016-12-29	Escombreras	1	1	Asparagus albus	0	NA	203	Turdus viscivorus	99.49	COI-fsd-degF	TCCTCCTAGCCTCTTCCACAGTAGAAGCAGGGGCGGGAACAGGCTGAACCGTCTATCCACCCCTCGCTGGCAACTTAGCCCATGCAGGAGCTTCAGTAGACCTGGCCATCTTCTCCCTCCACCTGGCAGGTATTTCCTCAATTCTGGGGGCCATCAACTTCATTACAACAGCAATTAACATAAAACCACCTGCCCTATCACAA
MN199937	150	2016-12-29	Escombreras	1	1	Withania frutescens	0	NA	235	Turdus viscivorus	99.56	COI-fsd-degF	AAGCTTCTGGCTACTTCCCCCATCCTTCCTCCTCCTCCTAGCCTCTTCCACAGTAGAAGCAGGGGCGGGAACAGGCTGAACCGTCTATCCACCCCTCGCTGGCAACTTAGCCCATGCAGGAGCTTCAGTAGACCTGGCCATCTTCTCCCTCCACCTGGCAGGTATTTCCTCAATTCTGGGGGCCATCAACTTCATTACAACAGCAATTAACATAAAACCACCTGCCCTATCACAA
MN199938	151	2016-12-29	Escombreras	6	2	Asparagus albus	4	Withania frutescens	181	Turdus viscivorus	99.43	COI-fsd-degF	AGAAGCAGGGGCGGGAACAGGCTGAACCGTCTATCCACCCCTCGCTGGCAACTTAGCCCATGCAGGAGCTTCAGTAGACCTGGCCATCTTCTCCCTCCACCTGGCAGGTATTTCCTCAATTCTGGGGGCCATCAACTTCATTACAACAGCAATTAACATAAAACCACCTGCCCTATCACAA
MN199881	152	2016-12-29	Escombreras	1	1	Withania frutescens	0	NA	228	Turdus viscivorus	99.55	COI-fsd-degF	GCTTCTGGCTACTTCCCCCATCCTTCCTCCCTCCTAGCCTCTTCCACAGAAGCAGGGGCGGGAACAGGCTGAACCGTCTATCCACCCCTCGCTGGCAACTTAGCCCATGCAGGAGCTTCAGTAGACCTGGCCATCTTCTCCCTCCACCTGGCAGGTATTTCCTCAATTCTGGGGGCCATCAACTTCATTACAACAGCAATTAACATAAAACCACCTGCCCTATCACAA
MN199978	153	2016-09-19	Gorguel	1	1	Pistacia lentiscus	0	NA	236	Turdus merula	99.56	COI-fsd-degF	TAAGCTTTTGACTCCTCCCCCCATCCTTCCTCCTCCTCCTAGCCTCCTCTACAGTAGAAGCTGGAGCAGGGACAGGTTGAACCGTCTATCCCCCCCTCGCCGGCAATCTAGCACATGCAGGGGCTTCAGTAGACTTAGCTATCTTCTCCCTACACCTCGCAGGAATCTCCTCAATCCTGGGGGCTATTAACTTCATCACAACAGCGATCAACATAAAACCACCTGCCCTATCACAA
MN199939	154	2016-09-19	Gorguel	2	2	Pistacia lentiscus	0	NA	235	Sylvia melanocepaha	100	COI-fsd-degF	AAGCTTCTGACTACTTCCCCCATCATTCCTCCTCCTACTAGCCTCCTCCACAGTAGAAGCTGGTGTGGGCACAGGATGAACTGTCTACCCCCCACTAGCCGGCAACCTGGCCCATGCCGGAGCCTCAGTAGACCTGGCCATTTTCTCCCTCCACCTTGCAGGAATCTCATCCATCCTAGGAGCAATCAACTTCATCACAACAGCAATCAACATAAAACCACCTGCCCTATCACAA
MN199979	155	2016-09-19	Gorguel	1	1	Pistacia lentiscus	0	NA	236	Sylvia melanocepaha	100	COI-fsd-degF	TAAGCTTCTGACTACTTCCCCCATCATTCCTCCTCCTACTAGCCTCCTCCACAGTAGAAGCTGGTGTGGGCACAGGATGAACTGTCTACCCCCCACTAGCCGGCAACCTGGCCCATGCCGGAGCCTCAGTAGACCTGGCCATTTTCTCCCTCCACCTTGCAGGAATCTCATCCATCCTAGGAGCAATCAACTTCATCACAACAGCAATCAACATAAAACCACCTGCCCTATCACAA
