# Supplementary material for: An integrative approach to discern the seed dispersal role of frugivorous guilds in a Mediterranean semiarid priority habitat
Source: PeerJ. 2019 Oct 11;7:e7609. doi: 10.7717/peerj.7609 (PMC6792472; doi:10.7717/peerj.7609)
Supplement: Supplemental Information 4 [file peerj-07-7609-s004.xlsx]

## Sheet: Mammals
Number of seeds dispersed by each mammal species in each dispersal event
	Plant species
Sample ID	FicusCarica	PhoenixDactylifera	CeratoniaSiliqua	PhoenixRoebelinii	RhamnusLycioides	RhamnusAlaternus	ChamaeropsHumilis	Seed disperser	Study area
1	0	1	0	0	0	0	0	Vulpes vulpes	Escombreras
2	67	0	0	0	0	0	0	Vulpes vulpes	Escombreras
3	38	0	0	0	0	0	0	Vulpes vulpes	Escombreras
4	32	0	0	0	0	0	0	Vulpes vulpes	Escombreras
5	0	0	1	2	0	0	0	Vulpes vulpes	Escombreras
6	0	0	0	0	0	0	5	Vulpes vulpes	Escombreras
7	0	2	1	0	0	0	0	Vulpes vulpes	Escombreras
8	0	0	0	0	0	0	1	Vulpes vulpes	Escombreras
9	37	0	0	0	0	0	0	Vulpes vulpes	Escombreras
10	0	0	1	0	0	0	0	Meles meles	Escombreras
11	86	0	4	0	0	0	0	Meles meles	Escombreras
12	0	0	2	0	0	0	0	Meles meles	Escombreras
13	0	0	3	0	0	0	0	Meles meles	Escombreras
14	0	0	2	0	0	0	0	Erinaceus europaeus	Escombreras
15	54	0	0	0	0	0	0	Martes foina	Escombreras
16	42	0	0	0	0	0	0	Martes foina	Escombreras
17	0	0	0	0	0	0	1	Martes foina	Escombreras
18	83	0	0	1	0	0	0	Martes foina	Escombreras
19	0	1	0	0	0	0	0	Vulpes vulpes	Cola de Caballo
20	23	0	0	0	0	0	0	Vulpes vulpes	Cola de Caballo
21	150	0	0	0	0	0	0	Martes foina	Cola de Caballo
22	0	0	0	0	2	0	0	Oryctolagus cuniculus	Cola de Caballo
23	100	0	0	0	0	0	0	Meles meles	Gorguel
24	11	0	0	0	0	0	0	Vulpes vulpes	Gorguel
25	0	1	0	0	0	0	0	Vulpes vulpes	Gorguel
26	0	0	0	0	0	1	0	Vulpes vulpes	Gorguel
27	0	4	0	0	0	0	0	Vulpes vulpes	Gorguel
28	0	1	0	0	0	0	0	Vulpes vulpes	Gorguel
29	0	0	0	0	1	0	0	Oryctolagus cuniculus	Cola de Caballo

## Sheet: Birds
Number of seeds dispersed by each bird species in each dispersal event
	Plant species
Sample ID	Phoenix Dactylifera	Ficus Carica	Phoenix Roebelinii	Ceratonia Siliqua	Rhamnus Lycioides	Rhamnus Alaternus	Chamaerops Humilis	Asparagus Albus	Asparagus Horridus	Daphne Gnidium	Lycium Intricatum	Myrtus Comunis	Osyris Lanceolata	Pistacia Lentiscus	Withania Frutescens	Seed disperser	Stydu area
40	0	0	0	0	0	0	0	1	0	0	0	0	0	0	0	Turdus viscivorus	Escombreras
41	0	0	0	0	0	0	0	1	0	0	0	0	0	0	0	Turdus viscivorus	Escombreras
44	0	0	0	0	0	0	0	1	0	0	0	0	0	0	0	Turdus viscivorus	Escombreras
45	0	0	0	0	0	0	0	1	0	0	0	0	0	0	0	Turdus viscivorus	Escombreras
46	0	0	0	0	0	0	0	1	0	0	0	0	0	0	0	Turdus viscivorus	Escombreras
71	0	0	0	0	0	0	0	1	0	0	0	0	0	0	0	Turdus viscivorus	Escombreras
72	0	0	0	0	0	0	0	1	0	0	0	0	0	0	0	Turdus viscivorus	Escombreras
80	0	0	0	0	0	0	0	1	0	0	0	0	0	0	0	Turdus viscivorus	Escombreras
82	0	0	0	0	0	0	0	1	0	0	0	0	0	0	0	Turdus viscivorus	Escombreras
84	0	0	0	0	0	0	0	1	0	0	0	0	0	0	0	Turdus viscivorus	Escombreras
86	0	0	0	0	0	0	0	1	0	0	0	0	0	0	0	Turdus viscivorus	Escombreras
87	0	0	0	0	0	0	0	1	0	0	0	0	0	0	0	Turdus viscivorus	Escombreras
88	0	0	0	0	0	0	0	1	0	0	0	0	0	0	0	Turdus viscivorus	Escombreras
89	0	0	0	0	0	0	0	1	0	0	0	0	0	0	0	Turdus viscivorus	Escombreras
110	0	0	0	0	0	0	0	1	0	0	0	0	0	0	0	Turdus viscivorus	Escombreras
112	0	0	0	0	0	0	0	1	0	0	0	0	0	0	0	Turdus viscivorus	Escombreras
117	0	0	0	0	0	0	0	1	0	0	0	0	0	0	0	Turdus viscivorus	Escombreras
141	0	0	0	0	0	0	0	1	0	0	0	0	0	0	0	Turdus viscivorus	Escombreras
142	0	0	0	0	0	0	0	4	0	0	0	0	0	0	0	Turdus viscivorus	Escombreras
143	0	0	0	0	0	0	0	1	0	0	0	0	0	0	0	Turdus viscivorus	Escombreras
145	0	0	0	0	0	0	0	1	0	0	0	0	0	0	0	Turdus viscivorus	Escombreras
149	0	0	0	0	0	0	0	1	0	0	0	0	0	0	0	Turdus viscivorus	Escombreras
151	0	0	0	0	0	0	0	2	0	0	0	0	0	0	4	Turdus viscivorus	Escombreras
7	0	0	0	0	0	0	0	0	1	0	0	0	0	0	0	Turdus viscivorus	Escombreras
11	0	0	0	0	0	0	0	0	1	0	0	0	0	0	0	Turdus viscivorus	Escombreras
12	0	0	0	0	0	0	0	0	2	0	0	0	0	0	0	Turdus viscivorus	Escombreras
39	0	0	0	0	0	0	0	1	1	0	0	0	0	0	0	Turdus viscivorus	Escombreras
43	0	0	0	0	0	0	0	0	1	0	0	0	0	0	0	Turdus viscivorus	Escombreras
47	0	0	0	0	0	0	0	0	1	0	0	0	0	0	0	Turdus viscivorus	Escombreras
61	0	0	0	0	0	0	0	0	1	0	0	0	0	0	0	Turdus viscivorus	Escombreras
79	0	0	0	0	0	0	0	0	1	0	0	0	0	0	0	Turdus viscivorus	Escombreras
81	0	0	0	0	0	0	0	0	2	0	0	0	0	0	0	Turdus viscivorus	Escombreras
140	0	0	0	0	0	0	0	0	1	0	0	0	0	0	0	Turdus viscivorus	Escombreras
55	0	0	0	0	0	0	0	0	0	0	3	0	0	0	0	Turdus viscivorus	Escombreras
56	0	0	0	0	0	0	0	0	0	0	5	0	0	0	0	Turdus viscivorus	Escombreras
58	0	0	0	0	0	0	0	0	0	0	5	0	0	0	0	Turdus viscivorus	Escombreras
59	0	0	0	0	0	0	0	0	0	0	3	0	0	0	0	Turdus viscivorus	Escombreras
60	0	0	0	0	0	0	0	0	0	0	4	0	0	0	0	Turdus viscivorus	Escombreras
85	0	0	0	0	0	0	0	0	0	0	10	0	0	0	0	Turdus viscivorus	Escombreras
90	0	0	0	0	0	0	0	0	0	0	2	0	0	0	0	Turdus viscivorus	Escombreras
91	0	0	0	0	0	0	0	0	0	0	12	0	0	0	0	Turdus viscivorus	Escombreras
92	0	0	0	0	0	0	0	0	0	0	2	0	0	0	0	Turdus viscivorus	Escombreras
94	0	0	0	0	0	0	0	0	0	0	1	0	0	0	0	Turdus viscivorus	Escombreras
95	0	0	0	0	0	0	0	0	0	0	2	0	0	0	0	Turdus viscivorus	Escombreras
96	0	0	0	0	0	0	0	0	0	0	20	0	0	0	0	Turdus viscivorus	Escombreras
97	0	0	0	0	0	0	0	0	0	0	5	0	0	0	0	Turdus viscivorus	Escombreras
98	0	0	0	0	0	0	0	0	0	0	16	0	0	0	0	Turdus viscivorus	Escombreras
99	0	0	0	0	0	0	0	0	0	0	1	0	0	0	0	Turdus viscivorus	Escombreras
144	0	0	0	0	0	0	0	0	0	0	1	0	0	0	0	Turdus viscivorus	Escombreras
42	0	0	0	0	0	0	0	0	0	0	0	0	1	0	0	Turdus viscivorus	Escombreras
63	0	0	0	0	0	0	0	0	0	0	0	0	1	0	0	Turdus viscivorus	Escombreras
109	0	0	0	0	0	0	0	0	0	0	0	0	0	0	1	Turdus viscivorus	Escombreras
113	0	0	0	0	0	0	0	0	0	0	0	0	0	0	1	Turdus viscivorus	Escombreras
115	0	0	0	0	0	0	0	0	0	0	0	0	0	0	1	Turdus viscivorus	Escombreras
121	0	0	0	0	0	0	0	0	0	0	0	0	0	0	1	Turdus viscivorus	Escombreras
123	0	0	0	0	0	0	0	0	0	0	0	0	0	0	5	Turdus viscivorus	Escombreras
126	0	0	0	0	0	0	0	0	0	0	0	0	0	0	2	Turdus viscivorus	Escombreras
139	0	0	0	0	0	0	0	0	0	0	0	0	0	0	1	Turdus viscivorus	Escombreras
146	0	0	0	0	0	0	0	0	0	0	0	0	0	0	1	Turdus viscivorus	Escombreras
147	0	0	0	0	0	0	0	0	0	0	0	0	0	0	9	Turdus viscivorus	Escombreras
150	0	0	0	0	0	0	0	0	0	0	0	0	0	0	1	Turdus viscivorus	Escombreras
152	0	0	0	0	0	0	0	0	0	0	0	0	0	0	1	Turdus viscivorus	Escombreras
108	0	0	0	0	0	0	0	0	0	0	0	0	0	0	1	Phoenicurus Ochruros	Escombreras
114	0	0	0	0	0	0	0	0	0	0	0	0	0	0	1	Phoenicurus Ochruros	Escombreras
118	0	0	0	0	0	0	0	0	0	0	0	0	0	0	1	Phoenicurus Ochruros	Escombreras
119	0	0	0	0	0	0	0	0	0	0	0	0	0	0	2	Phoenicurus Ochruros	Escombreras
120	0	0	0	0	0	0	0	0	0	0	0	0	0	0	4	Phoenicurus Ochruros	Escombreras
122	0	0	0	0	0	0	0	0	0	0	0	0	0	0	1	Phoenicurus Ochruros	Escombreras
125	0	0	0	0	0	0	0	0	0	0	0	0	0	0	3	Phoenicurus Ochruros	Escombreras
111	0	0	0	0	0	0	0	1	0	0	0	0	0	0	0	Phoenicurus Ochruros	Escombreras
57	0	0	0	0	0	0	0	0	0	0	6	0	0	0	0	Sylvia melanocephala	Escombreras
62	0	0	0	0	0	0	0	0	0	0	5	0	0	0	0	Sylvia melanocephala	Escombreras
116	0	0	0	0	0	0	0	0	0	0	7	0	0	0	0	Sylvia melanocephala	Escombreras
83	0	0	0	0	0	0	0	3	0	0	0	0	0	0	0	Turdus merula	Escombreras
93	0	0	0	0	0	0	0	3	0	0	0	0	0	0	0	Turdus merula	Escombreras
70	0	0	0	0	0	0	0	4	0	0	0	0	0	0	0	Turdus viscivorus	Cola de Caballo
17	0	0	0	0	0	0	0	0	0	1	0	0	0	0	0	Turdus viscivorus	Cola de Caballo
65	0	0	0	0	0	0	0	0	0	1	0	0	0	0	0	Turdus viscivorus	Cola de Caballo
67	0	0	0	0	0	0	0	0	0	1	0	0	0	0	0	Turdus viscivorus	Cola de Caballo
135	0	0	0	0	0	0	0	0	0	1	0	0	0	0	0	Turdus viscivorus	Cola de Caballo
106	0	5	0	0	0	0	0	0	0	0	0	0	0	0	0	Turdus viscivorus	Cola de Caballo
107	0	5	0	0	0	0	0	0	0	0	0	0	0	0	0	Turdus viscivorus	Cola de Caballo
22	0	0	0	0	0	0	0	0	0	0	0	2	0	0	0	Turdus viscivorus	Cola de Caballo
8	0	0	0	0	0	0	0	0	0	0	0	0	1	0	0	Turdus viscivorus	Cola de Caballo
15	0	0	0	0	0	0	0	0	0	0	0	0	1	0	0	Turdus viscivorus	Cola de Caballo
31	0	0	0	0	0	0	0	0	0	0	0	0	1	0	0	Turdus viscivorus	Cola de Caballo
33	0	0	0	0	0	0	0	0	0	1	0	0	2	0	0	Turdus viscivorus	Cola de Caballo
34	0	0	0	0	0	0	0	0	0	0	0	0	1	0	0	Turdus viscivorus	Cola de Caballo
36	0	0	0	0	0	0	0	0	0	1	0	0	1	0	0	Turdus viscivorus	Cola de Caballo
37	0	0	0	0	0	0	0	0	0	0	0	0	6	0	0	Turdus viscivorus	Cola de Caballo
66	0	0	0	0	0	0	0	0	0	0	0	0	1	0	0	Turdus viscivorus	Cola de Caballo
68	0	0	0	0	0	0	0	0	0	0	0	0	1	0	0	Turdus viscivorus	Cola de Caballo
69	0	0	0	0	0	0	0	0	0	1	0	0	1	0	0	Turdus viscivorus	Cola de Caballo
73	0	0	0	0	0	0	0	0	0	0	0	0	1	0	0	Turdus viscivorus	Cola de Caballo
101	0	0	0	0	0	0	0	0	0	0	0	0	1	0	0	Turdus viscivorus	Cola de Caballo
102	0	0	0	0	0	0	0	0	0	0	0	0	1	0	0	Turdus viscivorus	Cola de Caballo
103	0	0	0	0	0	0	0	0	0	0	0	0	1	0	0	Turdus viscivorus	Cola de Caballo
104	0	0	0	0	0	0	0	0	0	0	0	0	1	0	0	Turdus viscivorus	Cola de Caballo
137	0	0	0	0	0	0	0	0	0	0	0	0	1	0	0	Turdus viscivorus	Cola de Caballo
21	0	0	0	0	0	0	0	0	0	0	0	0	0	1	0	Turdus viscivorus	Cola de Caballo
32	0	0	0	0	0	0	0	0	0	0	0	0	0	1	0	Turdus viscivorus	Cola de Caballo
35	0	0	0	0	0	0	0	0	0	0	0	0	0	3	0	Turdus viscivorus	Cola de Caballo
38	0	0	0	0	0	0	0	0	0	0	0	0	0	1	0	Turdus viscivorus	Cola de Caballo
128	0	0	0	0	0	0	0	0	0	0	0	0	1	2	0	Turdus viscivorus	Cola de Caballo
134	0	0	0	0	0	0	0	0	0	0	0	0	0	1	0	Turdus viscivorus	Cola de Caballo
136	0	0	0	0	0	0	0	0	0	0	0	0	0	1	0	Turdus viscivorus	Cola de Caballo
105	0	0	0	0	0	1	0	0	0	0	0	0	0	0	0	Turdus viscivorus	Cola de Caballo
48	0	0	0	0	0	0	0	0	0	0	0	0	0	2	0	Sylvia melanocephala	Cola de Caballo
49	0	0	0	0	0	0	0	0	0	0	0	0	0	1	0	Sylvia melanocephala	Cola de Caballo
51	0	0	0	0	0	0	0	0	0	0	0	0	0	1	0	Sylvia melanocephala	Cola de Caballo
5	0	0	0	0	0	0	0	0	0	0	0	0	0	1	0	Turdus merula	Cola de Caballo
50	0	0	0	0	0	0	0	0	0	1	0	0	0	1	0	Turdus philomelos	Cola de Caballo
138	0	0	0	0	0	0	0	0	0	0	0	0	1	0	0	Sylvia atricapilla	Cola de Caballo
16	0	0	0	0	0	0	0	0	0	0	0	0	0	1	0	Erithacus rubecula	Cola de Caballo
100	0	0	0	0	0	0	0	0	0	0	0	0	0	1	0	Erithacus rubecula	Cola de Caballo
6	0	0	0	0	0	0	0	1	0	0	0	0	0	0	0	Turdus viscivorus	Gorguel
1	0	0	0	0	0	0	0	0	0	0	0	0	1	0	0	Turdus viscivorus	Gorguel
52	0	0	0	0	0	0	0	0	0	0	0	0	1	0	0	Turdus viscivorus	Gorguel
53	0	0	0	0	0	0	0	0	0	0	0	0	1	0	0	Turdus viscivorus	Gorguel
54	0	0	0	0	0	0	0	0	0	0	0	0	1	0	0	Turdus viscivorus	Gorguel
129	0	0	0	0	0	0	0	0	0	0	0	0	1	0	0	Turdus viscivorus	Gorguel
3	1	0	0	0	0	0	0	0	0	0	0	0	0	0	0	Turdus viscivorus	Gorguel
18	0	0	0	0	0	0	0	0	0	0	0	0	0	1	0	Turdus viscivorus	Gorguel
23	0	0	0	0	0	0	0	0	0	0	0	0	0	3	0	Turdus viscivorus	Gorguel
24	0	0	0	0	0	0	0	0	0	0	0	0	0	1	0	Turdus viscivorus	Gorguel
25	0	0	0	0	0	0	0	0	0	0	0	0	0	1	0	Turdus viscivorus	Gorguel
131	0	0	0	0	0	0	0	0	0	0	0	0	0	1	0	Turdus viscivorus	Gorguel
133	0	0	0	0	0	0	0	0	0	0	0	0	0	1	0	Turdus viscivorus	Gorguel
19	0	0	0	0	0	0	0	0	0	0	0	0	0	1	0	Sylvia melanocephala	Gorguel
132	0	0	0	0	0	0	0	0	0	0	0	0	0	2	0	Sylvia melanocephala	Gorguel
154	0	0	0	0	0	0	0	0	0	0	0	0	0	2	0	Sylvia melanocephala	Gorguel
155	0	0	0	0	0	0	0	0	0	0	0	0	0	1	0	Sylvia melanocephala	Gorguel
4	0	0	0	0	0	0	0	0	0	0	0	0	0	1	0	Phoenicurus Ochruros	Gorguel
153	0	0	0	0	0	0	0	0	0	0	0	0	0	1	0	Turdus merula	Gorguel
130	0	0	0	0	0	0	0	0	0	0	0	0	0	1	0	Turdus philomelos	Gorguel
14	0	0	0	0	0	0	0	0	0	0	0	0	0	1	0	Sylvia undata	Gorguel
2	0	0	0	0	0	0	0	0	0	0	0	0	0	1	0	Erithacus rubecula	Gorguel
13	0	0	0	0	0	0	0	0	0	0	0	0	0	1	0	Erithacus rubecula	Gorguel
20	0	0	0	0	0	0	0	0	0	0	0	0	0	2	0	Erithacus rubecula	Gorguel
26	0	0	0	0	0	0	0	0	0	0	0	0	0	2	0	Erithacus rubecula	Gorguel
27	0	0	0	0	0	0	0	0	0	0	0	0	0	1	0	Erithacus rubecula	Gorguel
